# Supplementary material for: Rapid geographical indication of peppercorn seeds using corona discharge mass spectrometry
Source: Sci Rep. 2021 Aug 9;11:16089. doi: 10.1038/s41598-021-95462-0 (PMC8352875; doi:10.1038/s41598-021-95462-0)
Supplement: Supplementary file 1 — Supplementary Information 1. [file 41598_2021_95462_MOESM1_ESM.xlsx]

## Sheet: Sheet1
COuntryofOrigin	101.00	102.10	103.00	104.00	105.00	106.00	107.10	108.10	109.10	110.10	111.10	112.10	113.10	114.10	115.10	116.10	117.10	118.10	119.10	120.10	121.10	122.10	123.10	124.10	125.10	126.10	127.10	128.10	129.10	130.10	131.10	132.10	133.10	134.10	135.10	136.10	137.10	138.10	139.10	140.10	141.10	142.10	143.10	144.10	145.10	146.10	147.10	148.10	149.10
Thailand	0.589116	0.851803	0.705506	1.22619	2.10256	2.4011	2.20689	1.28201	2.28369	2.65171	1.05496	1.19601	0.864098	1.03135	0.453722	1.11389	0.533596	1.35482	2.47554	2.62589	2.48274	2.42864	2.58906	2.50221	1.44576	1.63699	0.95592	1.57901	0.502537	0.530122	1.12654	1.61073	2.23275	2.79156	2.96012	1.91301	2.83199	2.88848	0.956426	1.21253	0.923155	2.92156	0.943997	1.18166	1.95042	2.51764	2.98873	3.49368	2.63017
Thailand	0.564141	0.761388	0.600485	1.33171	2.2345	2.57321	2.20573	1.28643	2.18535	2.58665	1.07896	1.23107	0.89351	1.22088	0.470083	1.19421	0.527441	1.58725	2.60202	2.70769	2.4921	2.4245	2.51604	2.49679	1.45983	1.68934	0.951353	1.76703	0.571246	0.504976	1.20817	1.7915	2.3025	2.87387	2.77956	1.80105	2.5889	2.66607	0.860534	1.16932	0.949948	2.93428	0.959318	1.20099	2.11979	2.71863	3.16967	3.56274	2.36235
Thailand	0.599581	0.875529	0.592085	1.34557	2.07822	2.35149	2.10626	1.2565	2.01418	2.4614	1.0149	1.125	0.869827	1.17811	0.488342	1.28776	0.549085	1.31068	2.47125	2.57619	2.32113	2.29357	2.34715	2.36546	1.3927	1.61078	0.953879	1.75514	0.610792	0.525791	1.0722	1.67669	2.15688	2.7304	2.58937	1.66844	2.35217	2.39945	0.777299	1.02631	0.901508	2.75567	0.873175	1.06307	2.01964	2.44461	2.98077	3.34248	2.15067
Thailand	0.455261	0.837257	0.529568	0.831163	1.49074	1.60366	1.53041	0.83105	1.65835	2.03247	0.720997	0.757654	0.578072	0.795079	0.355933	0.912596	0.379079	0.685115	1.7168	1.81991	1.6417	1.48159	1.80928	1.63681	0.905928	0.860615	0.694312	1.37363	0.461852	0.445815	0.749313	0.73558	1.63227	1.90233	2.14648	1.17309	2.31085	2.25659	0.584405	0.738715	0.568282	2.04095	0.526926	0.636558	1.1997	1.48859	1.96797	2.20893	1.67202
Thailand	0.443732	0.745396	0.379178	0.856332	1.88185	2.01605	1.86642	1.03815	1.88929	2.40441	0.893739	0.964132	0.724714	1.03135	0.406806	1.10979	0.328407	0.884823	2.0593	2.13631	1.84785	1.8073	2.07003	1.91401	1.12121	1.15592	0.853957	1.67124	0.462663	0.354721	0.969266	1.1663	2.09411	2.48045	2.46171	1.38457	2.82106	2.83122	0.648008	0.815707	0.629413	1.76054	0.579354	0.833304	1.59882	1.96964	2.51633	2.82736	1.64483
Thailand	0	0.0726175	0	0.489368	1.23931	1.47227	1.28226	0.48869	1.28856	1.80534	0.246655	0.285682	0.138916	0.3701	0	0.473523	0	0.326792	1.54002	1.64801	1.34052	1.27705	1.50492	1.32571	0.548753	0.642011	0.248726	1.06303	0	0	0.408322	0.502285	1.54274	1.96572	1.88011	0.846415	2.05874	2.08487	0.00458298	0.307664	0.110641	1.15745	0	0.35519	1.13953	1.50178	2.05906	2.36117	1.06265
Thailand	0	0	0	0.20558	0.937006	1.19774	1.23854	0.336979	0.828213	1.3145	0	0.257941	0	0.120595	0	0	0	0.136989	1.28944	1.41588	1.11556	0.995308	1.41752	1.30463	0.427525	0.676196	0	0.588154	0	0	0	0.264912	0.861956	1.56599	1.66429	0.634763	1.41526	1.37602	0	0.10812	0	2.59317	0.0268484	0.510304	1.05092	1.57817	1.61243	2.04083	0.8738
Thailand	0.145379	0.709434	0.0906577	0	0.475971	0.558206	0.823113	0.847918	0.747057	1.01853	0.204249	0.410171	0.128415	0.212672	0.0359383	0.377058	0.0380695	0.135112	0.725152	0.581655	0.800815	0.661404	1.19766	0.936403	0.326322	0.483068	0.164083	0.660899	0.0869423	0.487581	0.221778	0.118252	0.638795	0.996639	1.27119	0.419799	0.929696	0.911305	0.156123	0.282655	0.180519	2.1702	0.22335	0.178431	0.49603	0.801499	0.992626	1.26693	0.766019
Thailand	0.497288	0.788726	0.447148	0.561128	0.83645	0.86832	1.04733	0.840342	0.972824	1.17322	0.494337	0.736555	0.468812	0.433996	0.382869	0.635177	0.261358	0.399328	1.0681	0.977197	1.01489	0.978319	1.50646	1.32021	0.642216	0.692532	0.504728	1.00313	0.420877	1.09684	0.588432	0.455762	0.902506	1.1973	1.34326	0.561203	0.972891	1.09858	0.602525	0.811115	0.512649	2.45841	0.415016	0.650648	0.774649	0.838148	1.11287	1.5025	0.967405
Thailand	0.156667	0.181642	0.145116	0.236373	0.335228	0.415678	0.457116	0	0.718886	0.749826	0.16104	0.0382557	0.148697	0.130845	0.0860411	0.171233	0.109589	0.137652	0.422184	0.196978	0.820575	0.637245	0.701977	0.715621	0.242683	0.00469425	0.151648	0.144253	0.106282	0	0.00822237	0	0.386541	0.527177	1.13112	0.474543	0.861718	0.726397	0.0951925	0	0.117401	0	0.139451	0.024151	0.201758	0	0.53888	0.782344	1.23874
Thailand	0.183557	0.0931114	0.0647604	0.141724	0.299882	0.340865	0.441358	0	0.575441	0.62348	0.116201	0.0069388	0.124083	0.113198	0.0957159	0.166596	0.147284	0.127994	0.379947	0.222395	0.637004	0.507979	0.601691	0.504882	0.253974	0	0.123535	0	0.0143377	0	0	0.0134774	0.267004	0.476122	0.855973	0.447016	0.637241	0.582492	0.0999399	0	0.107271	0	0.145235	0.0413939	0.194896	0.0416623	0.48636	0.900316	0.929444
Thailand	0.186861	0	0.0570647	0	0.244494	0.257352	0.490538	0	0.424539	0.463926	0.0880188	0.0772398	0.107751	0.209123	0.0656688	0	0.104157	0.0664109	0.410825	0.0478402	0.517206	0.433736	0.559135	0.465827	0.208043	0.212548	0.0645966	0.00203531	0.00224724	0	0	0	0.260554	0.443032	0.751634	0.300229	0.555444	0.459759	0	0	0.0705741	0.105723	0.159132	0.154269	0.222994	0.115846	0.586555	0.724326	0.747643
Thailand	0	0	0	0	0.316071	0.6539	0.587278	0	0.515875	0.791809	0	0	0	0	0	0	0	0	0.431023	0.570275	0.846108	0.811293	0.747312	0.909508	0.0896895	0.180556	0	0	0	0	0	0.102387	0.117953	0.677703	1.13229	0.523564	1.2934	1.29994	0	0	0	0	0	0	0.277137	0.713739	0.857789	1.18424	1.17313
Thailand	0	0	0	0	0.124225	0.0959823	0.371152	0	0.34408	0.517836	0	0	0	0	0	0	0	0	0.285016	0.14397	0.847307	0.592862	0.676221	0.745888	0	0	0	0	0	0	0	0	0.0613444	0.303233	1.01253	0.2556	0.969209	0.877582	0	0	0	0	0	0	0	0.0643434	0.750705	1.2102	1.05498
Thailand	0.269882	0.233028	0.234773	0.163687	0.468836	0.526611	0.722347	0.114455	0.861476	0.976062	0.289876	0.162452	0.268998	0.307587	0.218262	0.300693	0.259333	0.223188	0.509086	0.334595	0.999195	0.851741	0.913636	0.959142	0.378748	0.353941	0.242808	0.223161	0.158626	0	0.185148	0	0.49215	0.632227	1.42848	0.799867	1.68659	1.58138	0.303684	0.235384	0.160246	0	0.174528	0.127725	0.3656	0.125777	0.603776	0.670387	1.35413
Thailand	0.257152	0.176503	0.162169	0.0976527	0.362148	0.460842	0.668164	0.0880249	0.719356	0.744336	0.232758	0.0481916	0.215801	0.281236	0.180603	0.178337	0.247218	0.0701002	0.426777	0.334753	0.800982	0.688548	0.767991	0.769693	0.364884	0.247257	0.236525	0.105154	0.130171	0	0.0368938	0.165964	0.370999	0.629915	1.08042	0.602729	1.29787	1.17282	0.188338	0.228272	0.129086	0	0.274317	0.203837	0.289034	0.068406	0.494941	0.892292	1.06488
Thailand	0.265043	0.235299	0.286632	0.107043	0.404329	0.459653	0.635232	0.174873	0.656459	0.704413	0.264547	0.0721797	0.183629	0.252901	0.208381	0.145465	0.227229	0.13493	0.465688	0.101755	0.704232	0.507208	0.704683	0.708677	0.315365	0.278903	0.210295	0.0111838	0.166894	0	0.127423	0.20484	0.42136	0.461268	1.02949	0.569024	1.1882	1.16384	0.298619	0.21873	0.174918	0	0.23483	0.101943	0.228844	0.309872	0.50763	0.781815	0.969175
Thailand	1.29573	0.683384	0.356747	0.695413	1.78833	1.70618	2.96415	0.982174	1.69178	2.05042	1.10345	2.8957	1.13144	2.51638	0.861692	1.044	0.574104	1.00692	1.8289	2.08274	2.02167	1.8629	3.33934	3.46406	1.91422	2.01643	0.875485	2.29205	0.777117	2.24303	1.0324	1.35077	1.87495	2.11979	2.87087	1.70296	1.80157	2.47617	1.76253	2.05972	1.314	5.99432	2.15292	1.96662	1.13698	2.11674	2.28462	2.95515	1.36551
Thailand	0.616649	0.372913	0.224741	0.369844	1.03012	0.985937	1.859	0.536237	0.980756	1.22802	0.544757	2.32912	0.672718	2.05335	0.525623	0.660261	0.29098	0.611725	1.00529	1.36068	1.22205	1.03076	2.49533	2.49185	1.08932	1.17107	0.468112	1.55197	0.444256	1.64187	0.552883	0.719481	1.04891	1.35965	1.89931	0.878634	1.11651	1.81341	1.02427	1.28803	0.678138	5.18548	1.39005	1.24744	0.576769	1.21806	1.31531	1.86449	0.79958
Thailand	0.389698	0.220487	0.168074	0.253775	0.611948	0.384906	1.18808	0.353447	0.628576	0.762538	0.360602	1.77142	0.426978	1.65882	0.320395	0.253732	0.225383	0.357057	0.577904	0.886649	0.758787	0.692841	1.9038	1.99478	0.61906	0.726877	0.307439	1.16919	0.26516	1.07979	0.393106	0.467367	0.75126	0.80771	1.27965	0.485665	0.735861	1.18218	0.606073	0.810897	0.473329	4.42111	0.934662	0.789581	0.314668	0.989721	1.00015	1.21065	0.477473
Thailand	0.0480614	0.399622	0	0.0428697	0.195471	0.339247	0.407811	0.228025	0.255993	0.369592	0.0737063	0.190448	0.103738	0.072266	0.0103967	0.131788	0	0.275272	0.244504	0.295605	0.460358	0.455271	0.47005	0.618903	0.115209	0.186579	0.0739396	0.15527	0.0272158	0.143254	0.124458	0.27587	0.263962	0.479865	0.570718	0.154082	0.516932	0.653472	0.0996533	0.244223	0.130312	1.22317	0.0857865	0.0991823	0.0892996	0.201438	0.455122	0.692148	0.25909
Thailand	0	0	0	0.0244403	0.0837981	0.0813784	0.18596	0	0.0335597	0.19198	0	0	0	0	0	0.142716	0	0.167229	0.0596475	0.214803	0.120742	0.201563	0.184877	0.390237	0	0.174634	0	0	0	0	0	0.231744	0.0506927	0.203493	0.304798	0.0709944	0.202008	0.402664	0	0.0159158	0	0.637571	0	0.0161651	0	0.12997	0.268209	0.303773	0.042799
Thailand	0	0	0	0	0	0.119032	0.136137	0.00545016	0.0386261	0.195951	0	0	0	0	0	0	0	0.16996	0.045825	0.166606	0.0921289	0.0841107	0.222172	0.397203	0	0.0366729	0	0	0	0.0704388	0	0.156539	0.0957015	0.337253	0.3959	0	0.179855	0.275289	0	0.0884347	0	0.570952	0	0	0	0.167146	0.313143	0.402013	0.0473978
Thailand	0.374249	0.499902	0.219327	0.357503	0.881015	0.682958	1.28689	0.556847	0.695199	0.804747	0.37268	1.47642	0.357707	1.51508	0.262239	0.366722	0.251443	0.547417	0.753968	0.986571	0.847126	0.805342	2.01098	2.02474	0.61576	0.558048	0.270048	1.23762	0.181913	1.4353	0.385646	0.339148	0.867752	1.00756	1.34055	0.507434	0.868111	1.0254	0.557778	0.787852	0.399947	4.30759	0.810699	0.875385	0.34879	0.830386	1.41291	1.45901	0.520537
Thailand	0.310899	0.512741	0.265631	0.400483	0.779807	0.597262	1.18092	0.520289	0.723463	0.810341	0.421676	1.39821	0.412	1.59116	0.274101	0.281185	0.265045	0.658175	0.824796	1.02915	0.843819	0.780639	1.89627	1.86532	0.596347	0.553659	0.334869	1.26024	0.297948	1.47052	0.506636	0.713555	0.941318	1.25905	1.40524	0.539831	0.881023	1.02423	0.694843	0.892776	0.479693	4.48133	0.904399	0.915088	0.545041	1.14931	1.5484	1.57102	0.580676
Thailand	0.255261	0.853555	0.170098	0.328396	0.388287	0.436757	0.593353	0.764548	0.465777	0.509311	0.327715	0.835129	0.290874	0.553802	0.156839	0.434484	0.143353	0.728749	0.499908	0.824783	0.717754	0.681595	1.08523	1.13594	0.27505	0.453317	0.258183	0.479353	0.244382	0.622945	0.428442	0.484877	0.614172	0.842668	0.819801	0.269302	0.544872	0.704831	0.396487	0.454777	0.23761	3.47701	0.475333	0.481257	0.227145	0.53238	0.634116	0.907641	0.317063
Thailand	0.124555	0.0671053	0.189373	0.493741	0.920387	1.05797	1.51926	0.263966	0.958548	1.41761	0.38816	0.500001	0.442707	0.4932	0.15385	0.428964	0.241029	0.55701	0.966806	1.35593	1.23088	1.18897	1.44103	1.57175	0.743093	0.875251	0.400198	0.689204	0.203128	0.18268	0.331343	0.453181	0.77222	1.14857	1.7944	1.0979	1.83113	1.98014	0.518024	0.683764	0.2863	0.868504	0.360587	0.459935	0.850311	1.05152	1.16571	1.67041	1.11268
Thailand	0.132954	0	0.0813155	0.137627	0.523851	0.510392	0.935818	0.0438188	0.586702	0.89813	0.204279	0.217889	0.243181	0.253803	0.136057	0.384742	0.155788	0.273858	0.623157	0.9178	0.739034	0.681365	0.889509	0.953165	0.388935	0.38201	0.2485	0.415368	0.0341959	0	0.0606213	0	0.443134	0.734105	1.18689	0.586772	1.24822	1.36686	0.240658	0.357315	0.104639	0.539302	0.215486	0.108067	0.532746	0.507358	0.636597	1.02805	0.688624
Thailand	0.126864	0.0669099	0.0938842	0.23805	0.370256	0.298433	0.556985	0.095636	0.477886	0.691377	0.159084	0.196351	0.226951	0.162152	0.126775	0.316163	0.171945	0.189956	0.358561	0.650275	0.596911	0.488389	0.569264	0.618838	0.255888	0.262475	0.23827	0.336577	0.0753587	0	0.0876747	0.101634	0.329988	0.560027	0.906345	0.365647	0.949793	1.02188	0.253152	0.278018	0.0729527	0.54144	0.189058	0	0.443741	0.572505	0.537345	0.729212	0.583804
Thailand	0.12711	0	0.0886939	0.292291	0.353084	0.234251	0.371626	0	0.451176	0.466037	0.11886	0.132779	0.147911	0.152783	0.120847	0.266999	0.156254	0.143143	0.288577	0.199537	0.622971	0.488011	0.586306	0.456374	0.19432	0.270035	0.171578	0.180716	0.0674053	0.0368971	0.0600009	0	0.299134	0.362894	0.910093	0.350463	0.787609	0.79132	0.177937	0.260761	0.0650709	0.780727	0.228609	0.0661594	0.468628	0.479696	0.635659	0.71964	0.788257
Thailand	0.13816	0	0.148804	0.263322	0.31431	0.0683441	0.312082	0	0.404474	0.475662	0.134547	0.145252	0.16974	0.108892	0.118498	0.301358	0.172807	0.129384	0.250957	0.19228	0.435329	0.276082	0.485185	0.348349	0.219092	0.244529	0.199403	0.226218	0.101277	0	0.0883945	0	0.278169	0.421232	0.761131	0.222714	0.636482	0.62223	0.190033	0.251165	0.126623	0.642363	0.175395	0.133993	0.352943	0.303823	0.498841	0.297972	0.593509
Thailand	0.123446	0.0317457	0.0962986	0.0966111	0.247727	0.0177419	0.274675	0.0491479	0.393149	0.415755	0.159161	0.207831	0.182433	0.0449948	0.111453	0.213054	0.157874	0.084138	0.318429	0.300329	0.397796	0.262233	0.374165	0.444512	0.179492	0.244415	0.23691	0.0938319	0.145837	0.111849	0.141899	0.014882	0.353123	0.36067	0.704727	0.184443	0.509007	0.626306	0.264104	0.173837	0.152927	0.546017	0.20046	0.242441	0.307411	0.35051	0.525405	0.366882	0.49323
Thailand	0.228595	0.0691255	0.172164	0.240192	0.816681	0.719165	1.65884	0.273662	0.920077	1.03638	0.40974	0.625745	0.449233	0.612519	0.311393	0.34251	0.264133	0.360321	0.855916	0.878358	1.09117	0.804705	1.6796	1.6293	0.736505	0.773821	0.422681	0.661927	0.233095	0.552694	0.336479	0.228622	0.787474	0.980388	2.01288	0.935922	1.12893	1.20736	0.846282	0.950895	0.368021	2.05826	0.491007	0.567377	0.650205	0.818839	1.12487	1.00781	0.927221
Thailand	0.213936	0.00801556	0.198083	0.394219	0.562465	0.39073	0.987838	0.11396	0.558322	0.676355	0.236922	0.414404	0.324709	0.335724	0.230004	0.409072	0.205474	0.127224	0.641444	0.779559	0.706621	0.519186	1.10719	1.09074	0.495829	0.474969	0.28296	0.513303	0.161945	0.41729	0.150009	0.15322	0.47012	0.707346	1.10835	0.511303	0.628625	0.752798	0.439437	0.515833	0.320104	1.71475	0.407014	0.399617	0.526511	0.814822	0.936341	0.890873	0.655154
Thailand	0.208992	0	0.18979	0.31625	0.46724	0.425469	0.634405	0.0728244	0.417062	0.494261	0.174147	0.35247	0.254353	0.260633	0.173724	0.282634	0.194291	0.187172	0.475452	0.544126	0.509939	0.503919	0.784873	0.665809	0.381117	0.497394	0.255367	0.354784	0.109428	0.247474	0.0623389	0	0.315897	0.540704	0.774652	0.277912	0.477048	0.581466	0.295377	0.44392	0.219581	1.39778	0.342152	0.330758	0.444865	0.412861	0.718628	0.73908	0.496329
Thailand	1.03347	0.547011	0.328522	0.424938	1.6854	1.72207	3.13255	0.974794	2.01156	2.32803	1.17541	1.99394	1.09095	2.24926	0.717103	0.855665	0.501282	0.747121	1.90612	2.0168	2.19084	2.06414	3.46369	3.55006	2.01044	1.90474	1.00558	2.04866	0.536619	1.60039	0.842175	1.08972	1.97375	2.29059	3.47973	2.27906	2.48666	2.468	1.89498	1.94327	1.27989	4.44496	1.50443	1.3735	0.843482	1.25049	2.01888	2.65905	1.31408
Thailand	0.837538	0.441518	0.348948	0.351463	1.47496	1.53311	2.91407	0.80926	1.74061	2.06615	0.9631	1.93769	0.946104	2.15586	0.583979	0.724933	0.43872	0.637477	1.57348	1.71762	1.77068	1.6437	3.13523	3.11077	1.56559	1.46897	0.735049	1.78827	0.388968	1.52541	0.58297	0.839733	1.59256	1.88811	2.84297	1.71062	1.85596	1.88962	1.41568	1.45943	0.940194	4.18886	1.20217	1.3217	0.694091	1.0122	1.60058	2.27439	0.908001
Thailand	0.468957	0.259904	0.313371	0.283939	1.01046	0.973517	2.18732	0.496015	1.16395	1.4472	0.631032	1.46155	0.655924	1.52287	0.392359	0.489528	0.32628	0.393211	1.06256	1.08027	1.2585	1.17402	2.54225	2.5556	1.19076	0.938361	0.491337	1.34017	0.309458	1.30918	0.440447	0.614964	1.13417	1.37979	2.28179	1.2691	1.31382	1.27515	1.06003	1.11361	0.767734	3.65465	0.879345	0.915137	0.500961	0.814133	1.27446	1.71931	0.656482
Thailand	0.335185	0.751087	0.470518	0.546988	1.59294	1.60624	1.74814	0.817164	1.46569	1.61018	0.685998	1.21229	0.714437	1.95544	0.454333	0.839689	0.441915	0.78488	2.00819	2.08812	1.8816	1.71698	2.24048	2.21578	1.05731	1.00203	0.65712	2.21915	0.484956	1.64892	0.842575	1.10386	1.7667	2.12808	2.37379	1.28094	2.25057	2.16818	1.13754	1.10903	0.684594	3.55983	0.879241	1.23561	1.36666	1.7585	2.9056	3.32527	1.59245
Thailand	0.172439	0.205576	0.166796	0.0709668	0.539617	0.382334	0.598545	0.162847	0.540779	0.645455	0.231687	0.455021	0.232008	0.63839	0.228204	0.34602	0.206601	0.282206	0.694494	0.665747	0.666244	0.63066	0.92782	0.865041	0.353244	0.0858989	0.240922	0.642647	0.139463	0.522035	0.147723	0.398676	0.502781	0.838552	0.940932	0.41466	0.863301	0.780647	0.293909	0.218603	0.22814	1.73313	0.197286	0.55906	0.355091	0.35932	1.13008	1.48836	0.659118
Thailand	0.113556	0.171701	0.124892	0.221233	0.337674	0.230518	0.390934	0.145995	0.43424	0.520697	0.181745	0.341342	0.154361	0.412698	0.168311	0.255161	0.209294	0.247688	0.465497	0.382462	0.502908	0.528468	0.652724	0.700699	0.232284	0.118339	0.210079	0.527666	0.129573	0.300047	0.194763	0.294157	0.39943	0.544987	0.790653	0.273494	0.698431	0.639067	0.289205	0.279337	0.199992	1.02822	0.146377	0.334296	0.220262	0.423512	0.820474	1.20002	0.532876
Thailand	1.5485	0.838819	0	0.572279	2.0741	2.05503	2.9035	0.741093	2.09549	2.34833	0.953209	2.11014	1.01786	2.82281	0.623484	0.899008	0.298449	1.00023	2.44585	2.56118	2.15805	2.08159	3.3375	3.37728	1.80713	1.60802	0.805014	2.90782	0.573713	1.10945	0.76815	1.45546	2.3842	2.79328	2.94444	1.86762	2.54309	2.52357	1.3145	1.46177	0.793638	4.88099	1.84147	1.79806	1.63017	2.15142	3.28691	3.99276	1.46032
Thailand	0.584167	0.184708	0.303512	0.653961	1.05683	1.12962	2.2421	0.41991	1.20636	1.49338	0.605721	1.11415	0.646308	1.20025	0.40413	0.597323	0.324921	0.319912	1.08771	1.25624	1.31032	1.18331	2.35415	2.35449	1.10868	1.25908	0.50886	1.35601	0.362295	1.28271	0.482035	0.619446	1.06472	1.27036	2.54286	1.56103	1.45111	1.49183	1.30245	1.41175	0.915443	4.01807	1.09551	1.19748	0.787262	1.25114	1.38935	1.87641	0.867779
Thailand	0.39838	0.078319	0.347759	0.55808	0.969791	1.00646	2.11395	0.309918	1.12626	1.39977	0.619884	1.16111	0.717118	1.22768	0.471752	0.619783	0.375379	0.456826	1.13485	1.23621	1.39573	1.30728	2.45672	2.47411	1.23927	1.34097	0.613253	1.48638	0.362464	1.44141	0.515715	0.704999	1.03239	1.29186	2.36382	1.47174	1.21704	1.40601	1.33679	1.41626	0.982949	3.82163	1.00322	1.18387	0.74056	1.26415	1.28308	1.87715	0.837459
Thailand	0.592729	0.120215	0.403841	0.765833	1.34921	1.40354	2.61669	0.5115	1.36025	1.69028	0.78097	1.73419	0.924152	1.67006	0.589903	0.817668	0.47611	0.463118	1.32906	1.54767	1.5605	1.43701	2.8645	2.8845	1.4589	1.68402	0.702694	1.8484	0.460652	1.80853	0.585144	0.821427	1.1712	1.41252	2.38234	1.46399	1.19186	1.59174	1.45632	1.5896	1.0459	4.24044	1.21147	1.47192	0.90802	1.5283	1.39692	2.16366	0.847075
Thailand	0.287405	0.219399	0.199036	0.506232	0.759048	0.932434	1.25476	0.0679511	0.818546	1.05959	0.395101	0.716801	0.431722	1.00562	0.292098	0.566316	0.196535	0.318368	0.991355	1.11681	1.10039	1.09078	1.37593	1.42465	0.618513	0.693507	0.291336	0.844577	0.193421	0.572634	0.234817	0.59882	0.674726	0.979023	1.53215	0.804739	1.21741	1.24966	0.463984	0.587	0.455158	3.05952	0.567845	0.798552	0.679339	0.963563	1.30361	1.56681	0.718416
Thailand	0	0	0	0	0.105992	0.520446	0.578623	0	0.0672243	0.411705	0	0.117871	0	0.90145	0	0	0	0	0.448905	0.80698	0.211498	0.47132	0.664282	0.871076	0	0.203563	0	0.502723	0	0	0	0.0118528	0.0491752	0.536124	0.697425	0.0609928	0.231995	0.474943	0	0	0	2.9618	0	0.0986939	0.150169	0.585192	0.829588	1.3385	0
Thailand	0.0800934	0.449411	0.0907149	0.263881	0.169164	0.233753	0.297844	0.341391	0.275986	0.383232	0.0500954	0.125293	0.107096	0.46004	0.110343	0.141716	0.024632	0.210049	0.188194	0.351911	0.456249	0.441465	0.368397	0.424776	0.069922	0.19654	0.097892	0.316645	0.0562662	0.0540447	0.0408428	0.11872	0.204831	0.247645	0.484863	0.20174	0.518254	0.433657	0.131406	0.181139	0.102049	1.62059	0.181454	0.325926	0.217625	0.363654	0.471827	0.492273	0.20743
Thailand	0.18562	0	0.0825354	0.434807	0.510431	0.584378	0.880306	0	0.626057	0.866898	0.256097	0.27251	0.306991	1.08585	0.216884	0.443628	0.216464	0.0661517	0.663638	0.784558	0.675284	0.731741	0.905638	1.01069	0.434335	0.463121	0.248097	0.760669	0.171485	0.24468	0.148251	0.295218	0.593847	0.650689	1.03264	0.670754	1.14876	1.2059	0.259931	0.297327	0.250712	0.867366	0.336764	0.430185	0.444694	0.505444	0.929442	1.25175	0.509061
Thailand	0.0824836	0	0	0.311552	0.538571	0.544066	1.0435	0	1.02095	1.22414	0.204263	0.164356	0.22207	1.87472	0.201846	0.515952	0.0597724	0.0406964	0.642052	0.872332	0.66333	0.625092	1.13494	1.23603	0.447892	0.510973	0.0864372	1.50351	0.073331	0.00493096	0	0.281122	0.979022	1.05936	1.59444	0.842662	1.43706	1.44063	0.0547025	0.203657	0.171568	1.56642	0.255784	0.760731	0.361558	0.636002	1.52869	1.67968	0.460628
China	0.909204	0.259742	0.3478	0.546542	1.77189	1.70002	2.75395	0.492585	1.96095	2.13016	0.964678	1.85099	0.930988	2.54511	0.58669	0.896819	0.498848	0.570347	1.85412	1.79352	1.96465	1.72559	3.20625	3.1297	1.60274	1.40148	0.825987	2.17359	0.483257	1.38762	0.639451	0.979643	1.99515	2.17291	3.01488	1.80172	2.224	2.25902	1.50465	1.52754	0.770834	4.85085	1.42498	1.24701	1.28264	1.67484	2.15668	2.8655	1.19121
China	1.12511	0.37227	0.348802	0.511598	1.76628	1.69142	2.82701	0.59781	1.93259	2.134	0.976363	1.80888	0.995958	2.47729	0.629659	0.928641	0.5467	0.706751	1.82254	1.79398	1.9008	1.71443	3.24414	3.15703	1.6569	1.53055	0.824934	2.20356	0.541609	1.6616	0.707018	0.976692	1.96062	2.11268	2.99663	1.74184	1.95857	2.05209	1.56896	1.58089	0.888089	5.10164	1.52859	1.42098	1.28437	1.67169	2.08037	2.63228	1.07926
China	0.378305	0.0771961	0.266757	0.42699	1.0877	0.918227	1.7513	0.263738	1.16863	1.27374	0.523587	1.07566	0.584214	1.68635	0.332097	0.447362	0.305638	0.465404	1.17366	1.12973	1.10252	0.908781	2.27313	2.16655	0.855956	0.787237	0.493056	1.36154	0.332173	0.840207	0.455098	0.555945	1.26236	1.36912	1.96927	0.892062	1.24849	1.20307	0.912647	0.855135	0.359955	4.00841	0.838218	0.776297	0.812249	1.11012	1.5107	1.88385	0.630342
China	0.146818	0.260291	0.183164	0.183824	0.485296	0.503772	0.549545	0.218201	0.594702	0.566199	0.247462	0.333045	0.23087	0.453207	0.16848	0.317832	0.2139	0.33791	0.554616	0.626965	0.706362	0.639476	0.782912	0.789716	0.242393	0.201023	0.242444	0.611353	0.205401	0.26392	0.269041	0.307282	0.600774	0.733714	1.01346	0.367048	0.810722	0.858267	0.377376	0.222866	0.0637433	1.65429	0.20021	0.111553	0.273385	0.391478	0.727671	0.644354	0.596864
China	0.128545	0.111108	0.0827301	0.221174	0.306264	0.259967	0.403845	0.0105695	0.431552	0.457358	0.145412	0.138932	0.171226	0.179229	0.0851422	0.403894	0.192938	0.205866	0.454781	0.27722	0.56274	0.589578	0.483492	0.468224	0.179562	0.192809	0.189223	0.242448	0.0807853	0.216001	0.150444	0.144279	0.38681	0.552658	0.656692	0.22864	0.544156	0.536613	0.201121	0.14414	0.0144672	1.07436	0.194648	0.143563	0.196656	0.179662	0.420464	0.406117	0.376749
China	0.119099	0.00243652	0.118885	0.195957	0.320604	0.329213	0.373287	0	0.358369	0.403174	0.14742	0.128924	0.13116	0.195206	0.131259	0.263303	0.188123	0.155512	0.36486	0.328841	0.407295	0.475219	0.453025	0.455278	0.147109	0.164519	0.171269	0.20183	0.107505	0.0927532	0.0623862	0.334776	0.293437	0.421332	0.578309	0.194481	0.436979	0.52452	0.179426	0.0433868	0.0549924	0.886588	0.159356	0.13091	0.218479	0.349289	0.498987	0.674777	0.319413
China	0.151353	0	0.10801	0.213545	0.310546	0	0.383012	0	0.327708	0.380376	0.168375	0.163072	0.167865	0.369257	0.163912	0.252805	0.148475	0.164619	0.276473	0.264634	0.36422	0.41355	0.504736	0.550956	0.187146	0.0579955	0.159136	0.302478	0.108249	0.227819	0.0311103	0.0228361	0.284755	0.364199	0.563422	0.143015	0.420906	0.373652	0.0976139	0	0.0632832	1.2608	0.231498	0.142081	0.165876	0.402252	0.420561	0.284452	0.296675
China	0.170442	0	0.181573	0.267034	0.379086	0.322123	0.457914	0	0.415063	0.498946	0.22807	0.310713	0.221369	0.350945	0.200337	0.298912	0.233535	0.212907	0.435699	0.353497	0.430685	0.358738	0.608099	0.580547	0.213487	0.10851	0.25804	0.386144	0.145432	0.274749	0.161418	0.298623	0.383223	0.467617	0.677167	0.345673	0.48889	0.486847	0.275024	0.185132	0.0801424	1.24246	0.198308	0.195667	0.268024	0.291844	0.465569	0.581062	0.370612
China	0.182149	0	0.203791	0.252889	0.361554	0.151092	0.472215	0	0.457605	0.480441	0.272033	0.344684	0.236054	0.343713	0.279446	0.360532	0.284922	0.342117	0.484623	0.322115	0.457253	0.449671	0.676467	0.599236	0.289032	0.291943	0.328316	0.44031	0.208483	0.282161	0.2394	0.289508	0.475859	0.622317	0.771426	0.346715	0.539788	0.501506	0.396738	0.266366	0.173041	1.55521	0.246425	0.262241	0.273528	0.374529	0.46214	0.45908	0.371115
India	0.343321	0	0.137744	0.0583136	1.16635	1.09055	2.03378	0.235545	1.17524	1.25818	0.477635	1.09832	0.425918	1.30227	0.431728	0.317144	0.238557	0.124184	1.18706	1.14089	1.70569	1.48023	1.97811	1.81081	1.37251	1.1236	0.532383	1.29498	0.15172	1.17246	0.327072	0.291436	1.01482	1.2101	2.17474	1.3228	1.56314	1.49438	1.63777	1.59438	1.4027	3.93079	0.89144	0.731429	0.549989	0.674711	1.57123	1.5383	1.02166
India	0.437535	0.192069	0.251287	0.169909	1.54958	1.47453	2.31558	0.464809	1.38868	1.53926	0.641937	1.45258	0.654464	1.80381	0.615224	0.693907	0.427427	0.331049	1.55127	1.55774	1.89058	1.71066	2.38959	2.23524	1.68513	1.44425	0.739252	1.68633	0.320757	1.47483	0.576219	0.654992	1.40217	1.7896	2.31547	1.40625	1.80438	1.80732	1.8601	1.82905	1.55162	4.47956	1.15079	1.11268	0.918264	1.30831	2.02364	2.16076	1.20956
India	0.424121	0.106539	0.218623	0.418626	1.45787	1.47062	2.23373	0.391504	1.25943	1.4047	0.587381	1.42495	0.631363	1.79426	0.634913	0.550991	0.339231	0.31199	1.43179	1.52359	1.71672	1.49485	2.30326	2.16959	1.61225	1.34847	0.709935	1.69535	0.339356	1.47636	0.525987	0.639204	1.22559	1.63332	2.07167	1.22607	1.36803	1.37743	1.56702	1.58127	1.38636	4.41291	1.04569	1.09019	0.812458	1.25437	1.78619	1.81661	0.983424
India	0.163655	0.112984	0.243939	0.271081	0.88518	0.912636	1.13005	0.146355	0.875256	0.905385	0.284375	0.575819	0.35017	0.613946	0.216521	0.453259	0.215356	0.380988	1.0168	0.823671	1.12849	1.06566	1.38404	1.30982	0.474557	0.463848	0.347535	0.683738	0.187027	0.545555	0.364404	0.471248	0.759052	0.70719	1.39415	0.741411	0.531596	0.469909	0.587265	0.559249	0.337434	3.32092	0.530606	0.342012	0.585044	0.769851	1.54817	1.55969	1.06482
India	0.123813	0	0.109731	0	0.291974	0.130214	0.321175	0	0.275982	0.237735	0.107734	0.214455	0.154261	0.256674	0.156055	0.233818	0.154567	0	0.34066	0.269178	0.259671	0.294409	0.407308	0.330842	0.149469	0.167163	0.133027	0.0514797	0.0969698	0.0753597	0.043518	0	0.144413	0.103778	0.214805	0.087238	0	0	0.0343509	0.0415274	0.0915215	1.64993	0.179557	0	0.237094	0.223625	0.398932	0.506266	0.376571
India	0.11061	0	0.147905	0	0.305164	0.270181	0.354228	0	0.296342	0.272217	0.133322	0.284885	0.157486	0.171124	0.144709	0.218887	0.107656	0	0.465029	0.16966	0.279348	0.398778	0.351813	0.291468	0.158804	0.218257	0.154491	0.16851	0.100023	0.0946587	0.142102	0.132595	0.253586	0.253003	0.287239	0.0496211	0	0	0.0522038	0	0.134876	1.10574	0.142106	0.123308	0.210434	0.503206	0.592283	0.40986	0.367947
India	0	0	0.0458326	0	0.283067	0.2009	0.305793	0	0.197323	0.283392	0.0108018	0.00389602	0.066779	0.0651289	0.0533157	0.0171823	0.0447177	0	0.282827	0.0859334	0.241164	0.370063	0.254599	0.204488	0.106163	0.115478	0.0689306	0.0417549	0.00683671	0	0.0858449	0.137514	0.125084	0.228808	0.153924	0	0	0	0.0454638	0.0297202	0.0251669	0.452933	0.075435	0.00584221	0.137383	0.34726	0.329207	0.0696323	0.24234
India	0	0	0	0	0.18329	0.114707	0.179195	0	0.0787493	0.098142	0	0	0	0	0	0	0	0	0.123801	0.138728	0.0528343	0.193669	0.104529	0.0698796	0	0.0641763	0	0	0	0	0	0.0799983	0	0.132722	0	0	0	0	0	0	0	0.165741	0	0	0.061503	0.0267831	0.208732	0.303094	0.110154
India	0	0	0	0	0.0806224	0	0.144776	0	0.014792	0.0318187	0	0	0	0	0	0	0	0	0.169084	0	0.0447534	0.158075	0.0694424	0.131376	0	0	0	0	0	0	0	0	0	0.0322952	0	0	0	0	0	0	0	0.176382	0	0	0.00628187	0.345186	0.153429	0	0.0267821
UK	0.239266	0.060683	0.280688	0.375525	1.4222	1.04039	1.42192	0.155384	1.14653	1.22482	0.447841	0.49442	0.393056	0.548881	0.283041	0.497454	0.322325	0.336861	1.82746	1.55149	1.84158	1.49236	1.61414	1.59655	0.571058	0.488291	0.397436	0.651186	0.323891	0.563071	0.535505	0.540922	1.36981	1.27277	1.90945	0.960626	1.63519	1.66729	0.658603	0.533149	0.380748	2.35417	0.501665	0.293269	0.723216	0.745883	2.4495	2.36463	1.37911
UK	0.277908	0.200689	0.303218	0.173083	1.06898	0.821125	1.11433	0.214208	0.913059	0.927467	0.389551	0.420802	0.351929	0.427484	0.245373	0.440827	0.340602	0.358171	1.42845	1.24937	1.3877	1.10172	1.33486	1.34456	0.488559	0.322013	0.386438	0.666278	0.320924	0.578725	0.491781	0.492216	1.05722	0.999972	1.50022	0.685535	1.22109	1.15814	0.616494	0.536519	0.335612	2.36352	0.43818	0.55276	0.587661	0.519889	1.98898	1.89128	1.06057
UK	0.275232	0.157597	0.26111	0.206779	0.989018	0.664156	1.01935	0.18013	0.779812	0.824503	0.352859	0.350157	0.335905	0.473443	0.302106	0.444227	0.323458	0.347405	1.36522	1.13669	1.29224	0.995137	1.32387	1.31766	0.468109	0.45004	0.317435	0.65861	0.244482	0.583811	0.389007	0.342975	0.910753	0.692012	1.29685	0.567787	0.980917	0.955491	0.518589	0.383091	0.237938	2.41661	0.428216	0.409045	0.517884	0.553288	1.86792	1.79325	0.922828
UK	0.21615	0.159211	0.247114	0.507884	1.90224	1.8015	2.11788	0.411346	1.78357	2.07923	0.645275	0.651405	0.545729	0.539839	0.305351	0.769663	0.384018	0.922239	2.43282	2.43746	2.51741	2.23969	2.02291	2.10785	1.00192	0.890407	0.628571	0.968386	0.333971	0.37417	0.709028	1.17241	1.8972	2.02252	2.67257	1.69215	2.4979	2.52221	0.989804	0.974046	0.503554	1.09112	0.561513	0.651803	1.29272	1.58854	3.04181	3.12835	2.01147
UK	0.161273	0.0625775	0.122619	0.412643	2.05945	1.87992	2.23484	0.42071	1.77203	2.09607	0.643953	0.655143	0.485795	0.501449	0.262256	0.576189	0.244712	0.904512	2.56611	2.47892	2.57719	2.2528	2.03129	2.08621	1.06728	0.962718	0.594441	0.990412	0.243307	0.224107	0.698285	1.30008	2.0209	2.11922	2.63166	1.5839	2.41915	2.46525	0.893145	0.904438	0.426086	0.958641	0.505986	0.740375	1.35181	1.6468	3.19625	3.2039	1.85535
UK	0.156021	0	0.115354	0.385525	2.13291	1.96674	2.26217	0.417081	1.79888	2.11817	0.627952	0.639546	0.466967	0.4887	0.228257	0.59062	0.260072	0.84734	2.68922	2.60589	2.66117	2.35815	2.07599	2.18334	1.03399	0.937093	0.598421	0.986586	0.225471	0.367617	0.762979	1.31759	2.07445	2.15717	2.62671	1.60048	2.38472	2.45756	0.914098	0.898561	0.469997	1.04599	0.50663	0.553731	1.42888	1.77903	3.27999	3.28683	1.86501
UK	0.278359	0.110231	0.199848	0	0.971365	0.734676	1.13028	0.148957	0.82826	0.864196	0.361796	0.417793	0.333688	0.46236	0.231299	0.504133	0.264714	0.282052	1.15041	1.22934	1.24168	1.03325	1.29446	1.27007	0.49435	0.398995	0.36249	0.583536	0.325439	0.404496	0.424286	0.323779	0.889917	0.876274	1.38802	0.795344	1.04189	0.993755	0.636247	0.448588	0.295759	2.51987	0.426547	0.450939	0.481197	0.414598	1.52621	1.68513	0.900729
UK	0.247774	0.0684085	0.253097	0.159458	0.77772	0.654419	0.849053	0.130142	0.685882	0.688041	0.360981	0.42117	0.351928	0.385111	0.239899	0.400538	0.288057	0.359424	1.07399	0.869929	1.02216	0.869545	1.14783	1.0927	0.409164	0.322954	0.335929	0.559039	0.304582	0.329127	0.430023	0.387772	0.788982	0.742895	1.09495	0.587834	0.736159	0.728531	0.534957	0.434872	0.288755	2.15208	0.354983	0.33472	0.405854	0.221804	1.38171	1.24447	0.692826
UK	0.260805	0.12639	0.355394	0.309746	0.91678	0.659065	1.00662	0.172616	0.883856	0.905036	0.37994	0.447095	0.316812	0.663197	0.302782	0.386982	0.327011	0.408466	0.969629	0.977447	1.65255	1.37787	1.30735	1.31576	0.543081	0.352246	0.38084	0.754256	0.335278	0.470422	0.467973	0.508163	0.758162	0.787682	1.57478	0.772157	1.73193	1.76392	0.850715	0.722316	0.427178	2.74254	0.448594	0.577723	0.411138	0.405483	1.18311	1.1228	1.3057
UK	0.0841941	0	0.211163	0.255847	0.492566	0.396017	0.587724	0.000891949	0.607789	0.659328	0.188202	0.250945	0.191731	0.369613	0.105778	0.396974	0.190084	0.172871	0.706731	0.431223	1.15353	0.990142	0.789671	0.747092	0.291953	0.148015	0.211092	0.43203	0.0858252	0.0890344	0.191533	0.306826	0.444526	0.695814	1.03161	0.485044	1.14659	1.07318	0.399979	0.270348	0.25623	1.53538	0.150757	0.286176	0.208642	0	0.849984	0.662848	0.82213
UK	0.0637769	0	0.131312	0.154372	0.420551	0.437067	0.504326	0	0.487259	0.579452	0.126841	0.156221	0.176488	0.177092	0.0799517	0.399347	0.177166	0.059805	0.561028	0.439196	0.901925	0.729507	0.584016	0.690778	0.249089	0.074774	0.170223	0.318389	0.0560467	0.0706779	0.173276	0.288861	0.361453	0.640652	0.83344	0.400632	0.931366	0.941296	0.384432	0.181145	0.157227	0.821086	0.150818	0.16298	0.166909	0.0906879	0.692653	0.463379	0.608493
UK	0.158893	0.0228233	0.455338	0.477461	1.73308	1.46853	1.67463	0.24103	1.43555	1.54532	0.578538	0.709638	0.411919	0.71512	0.270944	0.441821	0.368432	0.767712	2.04136	1.92952	2.19457	1.86002	1.86533	1.94317	0.981341	0.77558	0.650924	1.13917	0.215862	0.626245	0.502478	1.25485	1.1483	1.67689	2.27794	1.65131	2.34989	2.35742	1.13566	0.939474	0.661616	2.43383	0.604311	0.70053	0.841589	1.04628	2.12203	2.26313	1.74711
UK	0.164861	0.0465559	0.420034	0.602832	1.78341	1.58161	1.7756	0.323161	1.4638	1.62603	0.596753	0.732882	0.477327	0.783741	0.277785	0.555372	0.37712	0.80361	2.16219	2.18195	2.2538	1.96643	1.98664	2.03968	1.07641	0.982414	0.728128	1.11359	0.235612	0.901645	0.561526	1.31463	1.21418	1.79705	2.34075	1.81809	2.46488	2.45919	1.2282	1.0176	0.734763	2.78339	0.721983	0.847873	0.856616	1.06989	2.21125	2.52183	1.74653
UK	0.137792	0	0.203292	0.39905	0.77158	0.666028	0.685618	0.0215816	0.638827	0.72476	0.237965	0.297717	0.217652	0.348069	0.159423	0.350379	0.183473	0.413727	0.951776	0.700751	1.12853	0.957208	0.834599	0.801656	0.414502	0.260901	0.308882	0.455912	0.155819	0.331159	0.2091	0.479691	0.451278	0.704718	1.05306	0.673158	1.13363	1.15621	0.439714	0.309816	0.284142	1.37213	0.235592	0.388427	0.254842	0.186062	0.896572	0.905297	0.811417
UK	0.236599	0.201064	0.400917	0.505586	1.87955	1.6153	1.97761	0.344357	1.62448	1.77265	0.681169	0.880036	0.452134	1.38378	0.375166	0.555717	0.350868	0.863747	1.92335	1.61002	2.17985	1.86997	2.04908	2.07805	1.30163	0.982656	0.841099	1.6238	0.222611	0.528615	0.433732	1.12796	1.3472	1.73456	2.62682	1.60651	3.04962	3.12406	1.42782	1.20319	0.702892	3.70066	0.82642	0.918216	0.752272	0.681962	2.24063	2.20646	1.72035
UK	0.127378	0.159633	0.290282	0.515237	0.957654	0.823709	0.859123	0.139733	0.939896	0.98437	0.30978	0.291134	0.252679	0.448586	0.120201	0.47176	0.233403	0.317158	1.3131	0.862677	1.49987	1.22149	1.05068	1.07075	0.432401	0.372361	0.324965	0.625468	0.200291	0.151456	0.352243	0.491727	0.688832	0.918909	1.46935	0.672068	1.53909	1.51461	0.593067	0.350679	0.29489	1.63411	0.268805	0.336791	0.270665	0.473068	1.25953	1.19571	1.15927
UK	0.122625	0.0951391	0.268315	0.460564	0.904	0.719925	0.775908	0.0639506	0.915187	0.95834	0.2974	0.234746	0.230395	0.315341	0.0897954	0.53235	0.161651	0.488586	1.23087	0.867514	1.42027	1.16526	0.961034	0.975868	0.42492	0.321033	0.370452	0.6344	0.180083	0.21933	0.331749	0.459417	0.672585	1.0218	1.36163	0.655408	1.35689	1.33385	0.511918	0.292829	0.208951	1.25176	0.203973	0.161812	0.264158	0.342907	1.31705	1.25517	1.14898
UK	0.232936	0.49826	0.069791	0.489624	1.20043	1.3805	1.46253	0.10867	1.40934	1.50633	0.436419	0.462044	0.452688	1.04281	0.193702	0.855292	0.178728	0.635837	1.47888	1.32532	3.47166	3.0216	1.73114	1.68125	0.927847	0.754257	0.467662	1.32843	0.349155	0.482149	0.286559	0.843472	1.15196	1.51975	2.44833	1.39188	2.73635	2.81834	0.785478	0.765298	0.334426	3.31763	0.560504	0.50726	0.826004	0.894252	2.35341	2.42697	2.33023
UK	0.411447	0.536216	0.246392	0.623338	1.24438	1.37472	1.50431	0.189562	1.45661	1.59137	0.58818	0.613088	0.65966	1.12213	0.384316	0.867955	0.347096	0.790408	1.556	1.33295	3.44959	2.99382	1.80325	1.83642	1.00837	0.833489	0.624788	1.22316	0.497616	0.654477	0.424765	0.869286	1.20814	1.58733	2.43847	1.40488	2.70329	2.77115	0.81654	0.768264	0.467745	3.51588	0.685422	0.659106	0.871054	0.779468	2.35333	2.32654	2.36688
UK	0.335604	0.32829	0.165097	0.393126	1.22872	1.20943	1.50526	0.177724	1.34559	1.48511	0.49785	0.642489	0.507224	1.18421	0.345855	0.690522	0.260975	0.558415	1.43573	1.24564	3.43708	2.95105	1.74579	1.73195	0.969324	0.853342	0.472411	1.16881	0.415384	0.676025	0.347762	0.761732	1.12063	1.43559	2.38097	1.37343	2.58588	2.65324	0.656333	0.689305	0.421912	3.68179	0.648868	0.664308	0.926193	1.00463	2.39068	2.50487	2.3186
UK	0.333569	0.162891	0.215195	0.512099	1.02709	1.01438	1.37025	0.154896	0.919866	0.979857	0.381239	0.604586	0.547145	0.582754	0.328229	0.406917	0.229367	0.527967	1.29069	1.07158	1.83553	1.38911	1.63051	1.59429	0.841283	0.716585	0.496387	0.685644	0.258761	0.946465	0.459482	0.720857	0.84384	1.15748	1.66521	0.809492	1.08303	1.15948	0.922618	0.845274	0.738949	2.95312	0.622648	0.567204	0.910374	0.920114	1.72871	1.86771	1.30328
UK	0.364836	0.124693	0.245692	0.455601	0.926277	0.931449	1.37312	0.12335	0.786245	0.928789	0.340052	0.606082	0.590044	0.620074	0.383245	0.465282	0.278527	0.296152	1.12436	0.919985	1.60911	1.20543	1.59829	1.55468	0.815774	0.640742	0.463275	0.702841	0.227944	0.943615	0.384522	0.794905	0.746899	1.01856	1.457	0.730934	0.965503	1.06883	0.92199	0.870674	0.76086	2.9338	0.535579	0.526384	0.810305	0.840861	1.41171	1.51392	1.03394
UK	0.32851	0.155448	0.259338	0.333074	0.778114	0.753531	1.21625	0.131096	0.659437	0.697187	0.314122	0.549125	0.509555	0.63001	0.355571	0.42578	0.258139	0.470892	0.918537	0.726897	1.39931	1.00644	1.45969	1.42523	0.758609	0.660956	0.448306	0.557268	0.265726	0.887584	0.272316	0.468995	0.627193	0.905446	1.27926	0.639933	0.755754	0.821134	0.821748	0.786667	0.705274	2.83268	0.496177	0.388175	0.694495	0.880925	1.22149	1.45437	0.855461
UK	0.476704	0.405658	0.0881589	0.673954	1.38975	1.65659	1.81315	0.331268	1.27007	1.50732	0.539845	1.08881	0.639736	1.40589	0.381793	0.850995	0.375496	1.3045	1.70428	1.7923	2.95626	2.54479	2.14571	2.16292	1.35048	1.33675	0.585366	1.22263	0.356347	1.10045	0.552095	1.70994	1.2436	2.03271	2.26505	1.42437	1.69868	1.90996	0.913223	0.967569	0.744433	4.61966	1.11378	1.15362	1.41112	1.72469	2.31734	2.60078	1.96885
UK	0.0849502	0	0	0.115895	1.26362	1.42174	1.81515	0	1.21303	1.4597	0.156148	0.869994	0.314163	1.35691	0	0.266713	0	0.867969	1.5957	1.66216	3.34237	2.88021	2.11494	2.16739	1.21683	1.06384	0.148735	1.09089	0.0327856	0.866123	0.202767	1.41072	1.10496	1.87397	2.40303	1.28767	1.70479	1.83244	0.67947	0.828373	0.443223	4.72398	0.960281	0.92716	1.28355	1.51382	2.48735	2.69577	2.13572
UK	0	0	0	0	0.406206	0.643725	0.839788	0	0.321152	0.514047	0	0	0	0.0461199	0	0	0	0	0.720103	0.729828	2.48205	2.01779	1.17523	1.16665	0.156074	0	0	0	0	0	0	0.399918	0.178589	0.89275	1.5044	0.403808	0.694404	0.832771	0	0	0	3.62293	0	0	0.33372	0.543848	1.74687	1.92539	1.33142
[truncated: 150 more columns]

## Sheet: Sheet2
COuntryofOrigin	101.00	102.10	103.00	104.00	105.00	106.00	107.10	108.10	109.10	110.10	111.10	112.10	113.10	114.10	115.10	116.10	117.10	118.10	119.10	120.10	121.10	122.10	123.10	124.10	125.10	126.10	127.10	128.10	129.10	130.10	131.10	132.10	133.10	134.10	135.10	136.10	137.10	138.10	139.10	140.10	141.10	142.10	143.10	144.10	145.10	146.10	147.10	148.10	149.10
Thailand	0.253636	0.256444	2.41742	2.23525	1.04141	0.65526	1.40912	0.376901	1.28018	1.38598	0.308281	0.28846	0.247347	0.939514	0.19355	0.392181	2.33014	1.78833	1.33531	0.987872	1.2779	0.825247	1.34004	1.29053	0.474391	0.366723	0.182897	1.07113	0.123608	0	0.576458	0.334663	1.19403	1.16398	1.68958	0.876203	1.89909	1.89023	0.435256	0.277258	0.206066	1.41295	0.371961	0.189383	0.78733	0.551985	1.86305	1.61759	0.920079
Thailand	0.895516	0.736705	2.37174	2.154	1.96839	1.7541	2.54078	1.01341	1.99503	2.07108	0.879004	1.47765	0.815053	1.66601	0.641395	0.860896	2.42843	1.8197	2.3395	2.00635	2.09432	1.70039	2.96447	2.83796	1.48673	1.37862	0.892598	2.23629	0.593077	1.8996	1.16381	1.16972	2.13747	2.24444	2.52096	1.58769	2.22774	2.27066	1.64306	1.56393	0.844277	4.11837	1.32373	1.37073	1.63009	1.80181	2.97688	2.99732	1.02766
Thailand	0.565919	0.235253	1.53871	1.22496	0.969147	1.10442	1.49834	0.357759	0.99372	1.1204	0.370345	0.835063	0.384192	0.992955	0.310953	0.405292	1.59848	1.09054	1.42633	1.13376	1.24723	0.889059	2.1951	2.04545	0.872965	0.807734	0.374376	1.505	0.180733	1.15461	0.626767	0.441478	1.19567	1.29962	1.48884	0.843589	1.26622	1.48585	0.831022	0.814307	0.347375	3.47111	0.836743	0.88088	0.848829	1.03439	1.63263	1.86663	0.433258
Thailand	0.226449	0.205081	1.48351	1.40513	0.732084	0.713132	0.749721	0.172903	0.722994	0.788658	0.221762	0.161451	0.251767	0.462072	0.284431	0.332834	1.41115	0.981504	0.851541	0.7339	0.804919	0.624667	0.770053	0.806386	0.364839	0.108131	0.222617	0.762899	0.166819	0.15014	0.384951	0.386568	0.754736	0.856041	1.10172	0.559483	1.1224	1.11631	0.372348	0.172067	0.223027	0.584415	0.362802	0.274312	0.488537	0.385833	1.17577	1.26483	0.455944
Thailand	0.217604	0.257563	1.26941	1.11777	0.667085	0.637638	0.757083	0.289064	0.724467	0.765283	0.265234	0.0916679	0.294354	0.296705	0.23099	0.307982	1.25995	0.75722	1.03327	0.766202	0.82215	0.603297	0.765118	0.727994	0.36924	0.26447	0.260372	0.749051	0.120006	0	0.470205	0.499396	0.841194	0.896109	0.952749	0.555197	0.980569	1.02129	0.40259	0.298622	0.216622	0.787564	0.38583	0.245248	0.725428	0.782218	1.59555	1.651	0.424659
Thailand	0.200052	0.497655	1.08967	0.809077	0.715607	0.776586	0.748949	0.522432	0.74722	0.87015	0.279095	0.0977336	0.165405	0.300875	0.116098	0.481474	1.08805	0.663553	1.09297	0.87285	0.892663	0.712669	0.825904	0.846045	0.374772	0.485893	0.250089	0.946879	0.157892	0.108906	0.517036	0.516921	0.828586	1.10956	0.892541	0.497281	0.841435	0.823962	0.432556	0.291036	0.104435	0.74412	0.331817	0.160366	0.670457	0.492697	1.45657	1.51698	0.228118
Thailand	0.389556	0.54802	1.25045	0.955028	1.17716	0.957642	1.37413	0.489427	1.58752	1.66278	0.495168	0.518131	0.372119	1.00596	0.294011	0.598021	1.24618	0.735478	1.51479	1.10782	1.49627	1.14145	1.62852	1.46047	0.657933	0.566884	0.495757	1.39903	0.403572	0.275734	0.628112	0.530016	1.56381	1.54529	1.98068	1.19704	2.1537	2.15099	0.680192	0.434621	0.259049	2.24117	0.624356	0.673652	0.889395	0.601875	2.01081	1.93154	1.01485
Thailand	0.404257	0.656663	0.942408	0.815584	1.12347	1.12889	1.20508	0.712405	1.30477	1.3555	0.468807	0.443146	0.378036	0.824237	0.289522	0.636039	0.967156	0.529602	1.54102	1.16761	1.22433	0.93052	1.45323	1.36532	0.616756	0.71317	0.480552	1.28881	0.410234	0.386417	0.686023	0.609107	1.39171	1.59409	1.57143	0.768637	1.49931	1.38014	0.687009	0.47331	0.275474	2.41423	0.631286	0.629863	0.898389	0.717274	2.07794	2.09683	0.572367
Thailand	0.132619	0.0451855	0.425468	0.358161	0.567836	0.513445	0.597857	0.0837421	0.592308	0.650967	0.154842	0.0609756	0.177955	0.310598	0.107825	0.195952	0.554159	0.19112	0.864876	0.625047	0.565889	0.347617	0.685647	0.826017	0.228521	0.278758	0.142258	0.58098	0.110742	0	0.204369	0.208653	0.642849	0.701993	0.748193	0.459491	0.846659	0.740428	0.194969	0.0951356	0.0197246	0.9187	0.196376	0.113543	0.527936	0.0875212	1.3112	1.13035	0.31028
Thailand	0.0140075	0.301653	0	0.532817	1.52035	1.73755	1.90022	0.456872	1.86903	2.1559	0.665533	0.775165	0.505873	1.63476	0.249172	1.51949	0.12735	0.596991	2.11912	2.14132	1.69432	1.57554	2.09132	2.18936	1.19237	1.03952	0.500921	1.79843	0.263884	0.813944	0.439728	1.26198	2.13935	2.15835	2.366	1.57859	2.25507	2.34176	0.802766	0.982327	0.401704	2.30989	0.45183	1.0823	1.02901	1.55685	2.92308	3.15575	0.633586
Thailand	0	0.00595014	0	0.331885	1.17927	1.35727	1.43825	0	1.43359	1.61209	0.288231	0.366475	0.118227	1.0515	0	1.18072	0	0	1.77833	1.61126	1.30856	1.07223	1.56541	1.64269	0.714034	0.717363	0.147036	1.43884	0	0.620106	0.0822903	0.685733	1.82429	1.74295	1.89206	1.0448	1.58112	1.75316	0.255279	0.428293	0.117486	1.99499	0.275927	0.859326	0.666843	1.25	2.81332	2.96154	0.349486
Thailand	0	0.176064	0	0.368322	1.28084	1.48934	1.54403	0.14011	1.49085	1.71604	0.437235	0.542507	0.248523	0.98412	0.0813822	1.28607	0	0.515918	2.02524	1.94295	1.5449	1.39219	1.78267	1.86667	0.910255	0.840689	0.356442	1.50654	0.113851	0.770607	0.350078	0.972521	1.88506	1.90199	2.02685	1.15184	1.48103	1.73385	0.538343	0.628299	0.291501	2.21267	0.386456	1.05078	0.964238	1.44605	2.95506	3.13177	0.449795
Thailand	0.0361138	0.138578	0.0111765	0.629589	1.40558	1.41298	1.7235	0.26383	1.87183	2.01841	0.629647	0.687077	0.417539	1.24061	0.169737	1.10492	0.00189318	0.5358	1.89646	1.89845	1.52121	1.38435	1.95199	1.9801	1.10069	0.810022	0.478022	1.56231	0.300423	0.873724	0.446601	0.983435	2.06543	2.04804	2.29527	1.39626	2.13101	2.26307	0.709641	0.780721	0.44037	2.43275	0.573193	0.915981	0.873009	1.35749	2.82421	2.98099	0.611152
Thailand	0	0	0	0.117407	1.551	1.66657	1.77486	0.0838301	2.03426	2.1362	0.516339	0.50764	0.321725	1.37773	0	1.13553	0	0.294945	2.0015	1.92543	1.63633	1.3907	1.92066	1.9976	0.994061	0.585963	0.335189	1.71843	0.100839	0.927381	0.123399	0.599306	2.16209	2.14901	2.47387	1.44981	2.11602	2.18575	0.547059	0.575541	0.292394	2.84851	0.515737	1.07253	0.796264	1.1728	3.07143	3.22926	0.427628
Thailand	0	0	0	0.225087	1.14067	1.13436	1.37521	0	1.67666	1.78523	0.258988	0.247188	0	1.01411	0	0.873473	0	0	1.64736	1.60302	1.22452	1.02801	1.52488	1.55032	0.665244	0.432535	0.0505696	1.31619	0	0.588878	0	0.537953	1.80102	1.73423	2.16041	1.2344	1.72269	1.83948	0.299151	0.415314	0.0633408	2.52177	0.201363	0.80651	0.476179	0.887613	2.61485	2.73587	0.13826
Thailand	0.020606	0.226462	0.038213	0.559871	0.80444	0.937576	1.01216	0.214075	0.964668	1.04907	0.234347	0.366481	0.13664	0.833875	0.0701514	0.744717	0	0.268319	1.23388	1.30642	0.979897	0.788014	1.35219	1.35947	0.504698	0.31709	0.165542	0.850011	0.0231569	0.625318	0.239873	0.596627	1.40551	1.3687	1.36629	0.680031	0.982056	1.21071	0.256388	0.278285	0.0610725	2.52593	0.217018	0.644232	0.39356	0.999904	2.07067	2.14958	0.293655
Thailand	0	0	0	0.155684	0.426513	0.423871	0.492531	0	0.401711	0.550385	0	0	0	0.467607	0	0.284859	0	0.168196	0.658659	0.719447	0.31913	0.272114	0.742265	0.870858	0.109416	0.104263	0	0.546449	0	0.0323491	0	0.0990039	0.819507	0.873273	0.745139	0.187931	0.274501	0.573844	0	0	0	2.07264	0	0.0839447	0.0263303	0.546026	1.36937	1.60301	0
Thailand	0	0.0146965	0	0.494841	0.906	1.04548	0.916106	0.030544	0.851969	1.08172	0.0393373	0.28915	0	0.605526	0	0.734603	0	0.014886	1.29584	1.45171	0.880543	0.780226	1.25169	1.22457	0.43029	0.633529	0.05292	0.993831	0	0.420043	0.0832173	0.800995	1.21271	1.35562	1.1899	0.539149	0.557731	0.906649	0.0886919	0.148299	0.0321067	2.15418	0.257942	0.617334	0.597238	1.30949	2.01723	2.24589	0
Thailand	0.270816	0	0.184458	0.275751	0.979272	0.737754	0.988733	0	0.90855	0.955157	0.299904	0.373665	0.31144	0.572946	0.279425	0.442601	0.345549	0.496788	1.12643	0.631424	0.905023	0.690692	1.28442	1.23589	0.538971	0.243497	0.269434	0.661693	0.256676	0.429232	0.230765	0	0.958012	0.893694	1.39136	0.771324	1.46629	1.44124	0.395383	0.380678	0.222989	1.37443	0.402349	0.531708	0.740526	0.973203	1.73054	1.05963	0.721608
Thailand	0.326377	0.128239	0.239207	0.314123	0.788757	0.764403	0.80527	0.173151	0.758786	0.784349	0.332689	0.434832	0.313063	0.603012	0.333895	0.561171	0.320294	0.447639	0.873418	0.638373	0.754276	0.607096	1.08097	0.945857	0.508627	0.491029	0.325778	0.448595	0.274857	0.42732	0.190747	0.0222533	0.684081	0.742093	1.24205	0.755677	1.35645	1.30507	0.305476	0.312181	0.259901	1.2383	0.473563	0.703173	0.626864	0.999664	1.38962	1.13491	0.594039
Thailand	0	0	0	0	0.495979	0.473375	0.59514	0	0.405936	0.418187	0	0	0	0.384843	0	0.0930667	0	0	0.687765	0.57216	0.350341	0.128429	0.743067	0.886002	0.0747108	0	0	0.284282	0	0	0	0	0.436251	0.369021	0.871917	0.474867	0.572317	0.582824	0	0	0	1.13893	0	0	0.272215	0.897778	1.48511	0.841924	0
Thailand	0.251932	0	0.226116	0.591027	1.06752	1.06456	1.22318	0	0.954684	1.09789	0.40503	0.427937	0.359764	0.590504	0.246486	0.357526	0.323771	0.602356	1.17411	0.954876	0.979727	0.78794	1.38886	1.52322	0.670648	0.533229	0.32155	0.609854	0.212928	0.321881	0.229255	0.224823	0.844761	0.843022	1.37458	0.886874	1.41348	1.50652	0.390635	0.476442	0.205646	1.1493	0.488367	0.668014	0.863343	1.22091	1.7241	1.28911	0.628003
Thailand	0	0	0	0	0.470931	0.551184	0.544211	0	0.329297	0.404613	0	0	0	0.326752	0	0	0	0	0.655358	0.297058	0.227998	0.246688	0.648473	0.600775	0.0416499	0	0	0	0	0	0	0	0.229065	0.0890356	0.660437	0.275781	0.646411	0.651389	0	0	0	1.08941	0.12222	0.362936	0.349339	0.932931	1.31313	1.00585	0.255257
Thailand	0.00227733	0	0	0.183329	0.719261	0.652293	0.746335	0	0.721902	0.799948	0.0277205	0.0929358	0.0147573	0.330892	0	0.360164	0	0	1.00429	0.759139	0.569454	0.519084	0.988973	1.12747	0.244551	0.135976	0.175349	0.471578	0	0	0	0	0.684012	0.705775	0.932789	0.463334	0.870185	0.926206	0	0	0	1.54316	0.0522844	0.418282	0.557546	0.887754	1.57363	1.36207	0.232136
Thailand	0.436589	0	0.437899	1.17422	2.34678	2.56479	2.47129	0.542259	1.80271	2.17767	0.914029	1.23227	0.863681	1.43614	0.433022	0.607952	0.785424	1.31725	2.69489	2.6295	2.28793	2.16439	2.70643	2.73412	1.5884	1.6945	0.83888	1.41208	0.448388	0.571381	1.10162	1.34075	1.92869	2.25565	2.52501	1.84413	1.92977	2.24436	1.07125	1.24891	0.596813	2.6634	0.913143	1.44659	2.31918	2.98347	3.07345	2.89326	1.51062
Thailand	0.350239	0	0.140393	0.731126	1.88875	1.87359	1.94049	0.115966	1.26527	1.5987	0.58391	0.888677	0.557898	1.18876	0.33892	0.51005	0.459477	0.879043	2.1934	2.06553	1.66708	1.58715	2.08421	2.11025	1.14207	1.20402	0.519049	1.00628	0.168638	0.300336	0.688526	0.866071	1.47755	1.81947	1.91864	1.36132	1.29157	1.6892	0.62658	0.947318	0.360416	2.44388	0.829732	1.08135	1.94032	2.61134	2.69961	2.46916	0.95432
Thailand	0.165984	0	0	0.399116	1.44407	1.50886	1.5264	0	0.855123	1.20004	0.324822	0.493704	0.319886	0.846128	0.142837	0.252202	0.216929	0.469288	1.83286	1.72762	1.3306	1.25543	1.69256	1.77158	0.840217	0.821587	0.21889	0.643725	0.0403388	0.177633	0.434576	0.475677	1.14078	1.43342	1.52343	1.06687	0.917289	1.34127	0.324649	0.660005	0.293531	2.39873	0.630713	0.877835	1.60918	2.3085	2.35788	2.04899	0.620872
Thailand	0.0832335	0	0	0.567099	0.649633	0.796096	0.956215	0	0.842411	1.08687	0.05753	0.227826	0.0542434	0.634512	0	0.0650182	0.101293	0.30727	0.591879	0.498014	0.810843	0.710074	1.17929	1.23631	0.368855	0.396617	0	0.448577	0	0.115917	0	0.0153191	0.478489	0.557286	1.35258	0.709249	1.5678	1.53573	0.052451	0	0.165891	1.78101	0.233593	0.0423145	0.412134	0.533731	0.767557	0.841027	0.878744
Thailand	0.176641	0.0816406	0.18093	0.651211	0.663515	0.72064	0.916729	0.0489376	0.965824	1.04964	0.236915	0.343611	0.19006	0.555246	0.156047	0.337636	0.175648	0.484208	0.889287	0.633149	0.939332	0.709075	1.1256	1.12445	0.447532	0.476985	0.19587	0.630504	0.0675354	0.189269	0.0897501	0.281596	0.828639	1.02656	1.49454	0.688834	1.71517	1.66912	0.257276	0.227071	0.146766	1.57617	0.333478	0.257715	0.469	0.594408	1.06563	1.13716	0.887674
Thailand	0	0	0.242149	0.432959	0.454692	0.590223	0.608906	0	0.626073	0.780457	0	0	0	0.884293	0	0	0.787914	0.685019	0.55817	0.371389	0.42626	0.336294	0.758283	0.926317	0.155204	0.30596	0	1.02902	0	0.0326187	0	0	0.278109	0.41488	1.12805	0.431148	1.26059	1.31932	0	0	0	0.877769	0.00515471	0	0.172409	0.65173	0.836055	1.11196	0.572719
Thailand	0	0	0	0	0.519844	0.628617	0.757018	0	0.7689	0.900832	0	0	0	1.28337	0	0	0	0.00590495	0.764271	0.235333	0.484754	0.126363	0.787361	0.922925	0	0	0	1.39298	0	0	0	0	0.609105	0.689249	1.36222	0.464026	1.26032	1.22766	0	0	0	1.23115	0	0	0.0497337	0.658768	1.53606	1.66605	0
Thailand	0	0	0	0	0	0	0.0419964	0	0.095591	0.304758	0	0	0	0.559238	0	0	0	0	0	0	0	0	0.103299	0.208638	0	0	0	0.657134	0	0	0	0	0	0.00660032	0.701288	0	0.529468	0.46591	0	0	0	0.832969	0	0	0	0	0.783171	0.721695	0
Thailand	0.13485	0.301581	0.672332	1.15794	1.04227	1.43883	1.40336	0.439213	1.0519	1.26286	0.308734	0.505347	0.316987	0.730525	0.11899	0.296368	1.0704	1.16085	1.13796	1.02763	1.04747	1.09315	1.27376	1.47779	0.640438	0.869099	0.339962	0.765976	0.183478	0.300838	0.417939	0.407699	0.760825	1.04894	1.37667	0.729921	1.46294	1.46636	0.395079	0.491099	0.216517	1.19069	0.326534	0.275301	0.730641	1.31244	1.04144	1.15464	0.680545
Thailand	0	0	0.221111	0.519447	0.446878	0.507591	0.710256	0	0.412744	0.649326	0	0.0153163	0	0.27043	0	0	0.577064	0.651394	0.545847	0.548328	0.429795	0.594164	0.706886	0.914024	0.27047	0.424456	0	0.394887	0	0	0	0	0.274863	0.591404	0.890273	0.32137	0.910149	1.01864	0	0.173986	0	0.563526	0.0817712	0.133397	0.244341	0.398901	0.50752	0.583724	0.314863
Thailand	0	0	0	0.223317	0	0	0	0	0	0	0	0	0	0	0	0	0	0.253242	0	0	0	0	0	0.0194421	0	0	0	0	0	0	0	0	0	0	0.0136433	0	0.145856	0.280495	0	0	0	0	0	0	0	0	0	0	0
Thailand	0.961179	0.325049	1.94519	1.62451	1.67741	1.36291	2.76599	0.942422	1.77674	1.94702	0.853693	1.47923	0.919806	1.92411	0.704979	0.776777	1.51479	1.41553	1.51913	1.48838	1.8613	1.52153	2.84941	3.05466	1.64142	1.71779	0.723345	2.13098	0.442763	1.86176	0.624852	0.802395	1.39379	1.41169	2.51617	1.83135	1.81175	2.18318	1.4593	1.51574	0.935214	4.36331	1.46797	1.30192	1.25022	2.05235	1.85188	1.71724	1.10585
Thailand	0.761054	0.296041	1.44734	1.28135	1.24408	0.833977	2.18424	0.645259	1.18799	1.42898	0.552687	1.37096	0.67758	1.44913	0.58913	0.582946	1.11502	1.07817	1.02523	1.24334	1.27252	1.05295	2.41113	2.57235	1.30771	1.4986	0.509669	1.83426	0.356265	1.96914	0.451567	0.511329	0.926515	0.846331	1.73483	1.1433	1.06255	1.5309	1.02898	1.05519	0.866615	4.13881	1.19303	1.22397	1.03071	1.84062	1.31443	1.23823	0.61891
Thailand	0.719808	0.297959	1.42589	1.32628	1.31167	1.09624	2.31381	0.69266	1.31888	1.56997	0.644394	1.61018	0.826615	1.72961	0.649391	0.601535	1.16837	1.16888	1.25661	1.31691	1.5274	1.34331	2.77259	2.91343	1.51853	1.75382	0.618828	2.08817	0.479834	2.39955	0.567904	0.723355	1.08334	1.07592	1.93456	1.41836	1.13452	1.86145	1.21063	1.35644	0.943254	4.54408	1.39407	1.41971	1.11984	2.00131	1.48016	1.66219	0.724133
Thailand	0.0807634	0.304288	0.667985	0.675087	1.24055	1.16352	1.6031	0.43937	1.23867	1.43696	0.191045	0.607619	0.195531	2.2744	0.301148	0.318286	1.33029	1.43118	1.27301	1.40959	1.24837	1.16011	1.53981	1.80887	0.725428	0.86429	0.0789143	2.24869	0.0754041	0.31118	0.0777052	0.677147	1.02564	1.17258	1.51284	1.01843	1.40035	1.72211	0.0842202	0.376726	0.222312	3.07403	0.71437	1.23506	1.0522	1.85389	1.9371	2.39829	0.849058
Thailand	0.287997	0.246345	0.834799	0.833706	0.898875	0.675182	0.932432	0.189221	0.81208	0.928262	0.19717	0.182829	0.314611	0.831809	0.167286	0.493927	1.41794	1.39457	0.994634	0.854634	0.924	0.991885	0.920031	1.13712	0.438697	0.516988	0.254268	0.952085	0.129324	0.319388	0.11202	0.329292	0.672536	0.743957	0.984364	0.697718	0.947243	1.25614	0.0568056	0.157647	0.265076	1.98823	0.506115	0.491204	0.607499	1.18758	1.38044	1.13488	0.702976
Thailand	0.222734	0.0545608	0.592108	0.404512	0.50204	0.0165024	0.673374	0.0803127	0.453249	0.564617	0.0180831	0.108233	0.132818	0.614506	0.0714447	0.226253	1.21951	1.13701	0.535772	0.518926	0.55135	0.437032	0.617567	0.796404	0.267799	0.395687	0.11331	0.686688	0.0520869	0	0	0.0935374	0.30664	0.381214	0.539763	0.415001	0.573937	0.839367	0	0	0.163538	1.73633	0.324027	0.315612	0.353852	0.980646	0.949398	0.760815	0.401921
Thailand	0.932069	0.423	1.11812	1.01026	1.76053	1.47143	2.50867	0.788151	1.54622	1.70736	0.814217	1.94173	0.991508	1.89083	0.909822	0.804306	1.6184	1.65732	1.87835	1.83653	1.93892	1.60192	2.91222	3.08493	1.72444	1.82782	0.850369	2.56423	0.611662	2.94566	0.903542	0.970245	1.44206	1.42082	2.11137	1.53352	1.3053	2.03821	1.3493	1.53993	1.10256	4.71007	1.60666	1.68194	1.54808	2.52621	2.09974	2.01606	1.00281
Thailand	0.830369	0.357779	0.982773	0.847083	1.64551	1.37451	2.2624	0.652491	1.31477	1.54648	0.657088	1.93165	0.913521	1.69881	0.784112	0.823773	1.50382	1.48021	1.65993	1.5515	1.68117	1.51402	2.59623	2.75466	1.59221	1.85538	0.736129	2.34089	0.53786	2.80763	0.782929	1.03566	1.19932	1.25808	1.72463	1.21345	1.09795	2.13654	1.1614	1.43097	1.03899	4.51756	1.51892	1.71137	1.57793	2.82483	2.0274	1.84584	0.979773
Thailand	0.662611	0.358336	0.688759	0.712352	1.23386	0.972747	1.70227	0.416481	0.929721	1.11935	0.426517	1.53067	0.679244	1.31282	0.552515	0.657279	1.0522	1.06132	1.212	1.01687	1.19489	1.07024	1.97664	2.07057	1.07691	1.17041	0.492323	1.76797	0.343033	2.26592	0.494135	0.632897	0.703669	0.787305	0.9869	0.750175	0.653271	1.43914	0.574871	0.795886	0.622682	3.71511	1.02667	1.15093	0.991448	2.23925	1.33242	1.28313	0.495777
Thailand	1.90855	1.22785	1.57458	1.69476	3.48991	3.81426	4.39568	2.72388	3.55389	3.96147	2.52285	3.38487	2.34305	2.54896	2.00759	2.04531	1.69683	2.06454	3.71209	3.87158	3.81266	3.64438	4.64792	4.74668	3.45349	3.80706	2.4336	3.04551	1.71833	3.0103	2.46942	2.68994	3.4289	3.64287	4.51634	3.4497	3.26156	4.05174	3.60395	3.79982	2.59929	4.62307	2.85496	2.67971	2.86926	3.08311	3.85708	4.20619	2.36652
Thailand	0.990565	0.604458	1.05653	1.06603	2.38647	2.73405	3.36207	1.75759	2.45497	2.86389	1.53445	2.75679	1.49514	1.97023	1.22779	1.29767	0.974556	1.3166	2.50663	2.61869	2.63191	2.47533	3.78535	3.75012	2.44485	2.76422	1.47278	2.10767	1.01967	2.42739	1.52859	1.71393	2.23945	2.42785	3.23973	2.25887	2.17671	3.39911	2.53849	2.70312	1.71973	3.79053	1.94327	1.80629	1.7966	2.08195	2.72847	3.23382	1.39969
Thailand	0.729878	0.445843	0.871899	0.985695	1.96152	2.29579	2.8274	1.31856	1.9594	2.38903	1.09845	2.46549	1.09907	1.74368	0.936864	1.00943	0.755451	0.876842	2.12134	2.21558	2.14957	1.96937	3.33048	3.31442	2.07364	2.35067	1.09721	1.8536	0.820682	2.22801	1.21882	1.30225	1.9218	2.12465	2.7985	1.7962	1.89244	3.21289	2.10725	2.34844	1.3862	3.59145	1.71938	1.59937	1.58087	2.05255	2.49903	3.09388	1.3026
Thailand	1.77904	0.967543	0.571873	0.498158	2.30049	2.41753	3.10612	1.44965	2.60654	2.72312	1.26849	1.94061	1.02936	2.37653	0.989426	1.01681	0.568279	0.736256	2.53274	2.49202	2.43275	2.12895	3.31758	3.18333	1.89072	1.9262	1.10446	2.27232	0.741383	0.954735	0.987123	1.15427	2.54633	2.54549	3.2446	2.17201	2.58148	2.6102	2.04428	2.07076	0.95327	3.84776	1.8646	1.59797	1.66164	1.75354	2.95552	3.20395	1.18774
Thailand	1.38996	0.708152	0.528112	0.430454	1.96544	2.02319	2.81961	1.237	2.26632	2.40536	1.05507	1.79024	0.929123	2.15125	0.844372	0.79319	0.530827	0.619786	2.2087	2.21213	2.17368	1.8209	3.15442	3.023	1.73545	1.89136	1.00154	1.92872	0.582643	0.92294	0.917762	0.835455	2.16294	2.24691	2.93167	1.84868	2.23061	2.31105	1.90068	1.92926	0.795709	3.63053	1.68496	1.35266	1.42855	1.46727	2.62749	2.83967	0.922847
Thailand	1.11891	0.583039	0.433463	0.204471	1.45414	1.61363	2.37492	0.983793	1.85472	2.03901	0.772234	1.50186	0.653939	1.67507	0.612546	0.582625	0.409187	0.504935	1.87525	1.66122	1.77365	1.47433	2.79407	2.69656	1.41216	1.62572	0.77098	1.58011	0.456554	0.841961	0.674519	0.626644	1.76079	1.76384	2.48371	1.46694	1.7413	1.87245	1.57902	1.59017	0.671315	3.24948	1.39831	1.05714	1.06744	1.09894	2.14067	2.43874	0.711444
Thailand	0.70585	1.10642	0.538247	0.421848	1.42036	1.73142	2.01331	1.36924	1.65631	1.78109	0.651124	1.15235	0.518902	1.00934	0.463677	0.820395	0.334606	0.717399	1.66784	1.66261	1.60401	1.34682	2.25558	2.11147	1.06912	1.20824	0.664969	1.20406	0.375445	0.647191	0.735798	0.513003	1.50039	1.64045	2.34316	1.33568	1.84171	1.97188	1.16553	1.16154	0.489972	2.4249	0.860672	0.843986	1.06423	1.11093	2.0269	2.41607	0.755387
Thailand	0.437615	0.374109	0.486454	0.445738	1.00904	1.17111	1.72506	0.584078	1.27055	1.45051	0.581093	1.26128	0.438748	0.821797	0.43487	0.491063	0.303322	0.485311	1.30407	1.2611	1.26908	1.10293	2.33539	2.24448	0.997308	1.05606	0.593683	1.17414	0.36698	0.897505	0.620731	0.524882	1.16444	1.24185	1.88475	0.933527	1.26286	1.59486	1.05232	1.09098	0.483795	2.45467	0.812333	0.665309	0.68507	0.62375	1.43046	1.75608	0.432918
Thailand	0.402993	0.352789	0.464239	0.360427	1.01827	1.19801	1.6208	0.593231	1.20557	1.33636	0.499493	1.15132	0.401793	0.94606	0.418687	0.53913	0.260998	0.236962	1.29051	1.23106	1.20866	0.985469	2.21279	2.09373	0.939143	1.01237	0.522281	0.987823	0.336469	0.919957	0.614239	0.641822	1.18914	1.2603	1.85911	0.97475	1.29186	1.62974	0.982787	1.00186	0.432179	2.3391	0.773822	0.56669	0.615108	0.659572	1.614	1.85754	0.4145
China	0.138506	1.13496	0.497722	0.420131	0.519368	1.04199	0.695724	1.14464	0.749407	0.674543	0.265906	0.154341	0.0952738	0.340956	0.126457	0.0401033	0.300899	0.714538	0.540678	0.817201	0.902037	0.871127	0.761219	0.759681	0.237385	0.592909	0.150853	0.277333	0.184005	0.101116	0.236711	0.446087	0.575646	0.552675	0.904754	0.493191	0.992163	1.04866	0.281067	0.145278	0.099566	0.733085	0.155282	0.519217	0.392366	0.359909	0.951336	1.12153	0.547673
China	0.0185902	0.0264882	0.218902	0.291113	0.441553	0.748638	0.754187	0	0.591271	0.665874	0.128314	0.175416	0.0946356	0.300142	0.0384504	0	0.145173	0.351097	0.663493	0.68413	0.665824	0.496954	0.883603	0.835214	0.263375	0.200415	0.153439	0.366146	0.0301954	0.0654341	0.139159	0.790142	0.496005	0.277798	0.736996	0.347655	0.863868	0.800048	0.0656883	0.0722001	0.0284758	1.00927	0.114423	0.512778	0.452624	0.278159	0.986606	0.984583	0.223271
China	0	0	0.142738	0.25283	0.364192	0.376901	0.559936	0	0.415551	0.521947	0.0708314	0	0	0.152505	0	0	0.0872086	0.311078	0.401303	0.433747	0.373905	0.234177	0.51221	0.521148	0.0358561	0.05128	0.0192382	0.311177	0.0137975	0	0.054561	0.568436	0.349146	0.107286	0.492684	0.179728	0.631478	0.6791	0	0	0	0.800403	0.0813344	0.224683	0.267328	0.196297	0.798817	0.788104	0.171615
China	0	0	0	0	0.544494	0.575148	1.16739	0	1.11989	1.31815	0	0.239286	0	1.51102	0	0	0	0	0.761175	0.468526	0.588964	0.324022	1.15181	1.0841	0	0	0	1.40123	0	0	0	0.0157015	0.803394	0.754411	1.63542	0.682673	1.84001	1.81033	0	0	0	2.2676	0	0.140913	0.145561	0	1.36173	1.77991	0
China	0	0	0	0	0	0	0.303134	0	0.66193	0.66931	0	0	0	1.02	0	0	0	0	0	0	0	0	0.332249	0.306336	0	0	0	1.0048	0	0	0	0	0.436474	0.193001	1.05757	0.0543523	1.31955	1.23806	0	0	0	1.92446	0	0	0	0	0.814898	1.37926	0
China	0	0	0.0405	0.0956619	0	0.116517	0.514261	0	0.19853	0.347838	0	0	0	0	0	0	0	0	0.0983456	0.0742637	0	0.00518187	0.351345	0.328925	0	0	0	0	0	0	0	0	0	0	0.252406	0	0.556618	0.697226	0	0	0	0.568104	0	0	0	0	0.220032	0.255618	0
China	0.133207	0.105831	0.671894	0.625527	0.683267	0.754428	0.841853	0	0.713422	0.747181	0.265965	0.272542	0.187498	0.377137	0.121972	0.215866	0.551628	0.64367	0.816731	0.755762	0.661134	0.681883	0.832504	0.894874	0.30829	0.26305	0.198788	0.514541	0.156625	0.236801	0.385717	0.745965	0.686007	0.662983	0.942232	0.468178	0.94959	1.07784	0.255841	0.107858	0.0908131	1.44211	0.299157	0.651903	0.586825	0.637799	1.14017	1.29579	0.22542
China	0.0358725	0	0.421875	0.4304	0.422452	0.627107	0.629247	0	0.482749	0.562363	0.0826929	0.0920441	0.0889916	0.221037	0.0716283	0.114868	0.373465	0.359893	0.632989	0.48681	0.437614	0.382561	0.603794	0.708618	0.129076	0	0.138697	0.346791	0.0590236	0.0179059	0.20399	0.481122	0.397235	0.276548	0.633652	0.401584	0.70976	0.817604	0.0492247	0	0.0766514	1.2979	0.22628	0.538159	0.430359	0.648583	0.884431	1.12317	0.114997
China	0	0	0.135997	0.106877	0.43038	0.337598	0.632854	0	0.651832	0.75603	0	0	0	0.545407	0	0	0.0663017	0	0.731743	0.684674	0.386266	0.27323	0.564622	0.551184	0.0218515	0	0.0263386	0.560307	0	0	0.129807	0.406629	0.607298	0.536591	0.889497	0.317336	0.748904	0.776891	0	0	0	1.75404	0.0507113	0.47049	0.250857	0.14503	1.16686	1.05822	0
[truncated: 150 more columns]

## Sheet: Sheet3
COuntryofOrigin	101.00	102.10	103.00	104.00	105.00	106.00	107.10	108.10	109.10	110.10	111.10	112.10	113.10	114.10	115.10	116.10	117.10	118.10	119.10	120.10	121.10	122.10	123.10	124.10	125.10	126.10	127.10	128.10	129.10	130.10	131.10	132.10	133.10	134.10	135.10	136.10	137.10	138.10	139.10	140.10	141.10	142.10	143.10	144.10	145.10	146.10	147.10	148.10	149.10
Black Pepper	0.589116	0.851803	0.705506	1.22619	2.10256	2.4011	2.20689	1.28201	2.28369	2.65171	1.05496	1.19601	0.864098	1.03135	0.453722	1.11389	0.533596	1.35482	2.47554	2.62589	2.48274	2.42864	2.58906	2.50221	1.44576	1.63699	0.95592	1.57901	0.502537	0.530122	1.12654	1.61073	2.23275	2.79156	2.96012	1.91301	2.83199	2.88848	0.956426	1.21253	0.923155	2.92156	0.943997	1.18166	1.95042	2.51764	2.98873	3.49368	2.63017
Black Pepper	0.564141	0.761388	0.600485	1.33171	2.2345	2.57321	2.20573	1.28643	2.18535	2.58665	1.07896	1.23107	0.89351	1.22088	0.470083	1.19421	0.527441	1.58725	2.60202	2.70769	2.4921	2.4245	2.51604	2.49679	1.45983	1.68934	0.951353	1.76703	0.571246	0.504976	1.20817	1.7915	2.3025	2.87387	2.77956	1.80105	2.5889	2.66607	0.860534	1.16932	0.949948	2.93428	0.959318	1.20099	2.11979	2.71863	3.16967	3.56274	2.36235
Black Pepper	0.599581	0.875529	0.592085	1.34557	2.07822	2.35149	2.10626	1.2565	2.01418	2.4614	1.0149	1.125	0.869827	1.17811	0.488342	1.28776	0.549085	1.31068	2.47125	2.57619	2.32113	2.29357	2.34715	2.36546	1.3927	1.61078	0.953879	1.75514	0.610792	0.525791	1.0722	1.67669	2.15688	2.7304	2.58937	1.66844	2.35217	2.39945	0.777299	1.02631	0.901508	2.75567	0.873175	1.06307	2.01964	2.44461	2.98077	3.34248	2.15067
Black Pepper	0.455261	0.837257	0.529568	0.831163	1.49074	1.60366	1.53041	0.83105	1.65835	2.03247	0.720997	0.757654	0.578072	0.795079	0.355933	0.912596	0.379079	0.685115	1.7168	1.81991	1.6417	1.48159	1.80928	1.63681	0.905928	0.860615	0.694312	1.37363	0.461852	0.445815	0.749313	0.73558	1.63227	1.90233	2.14648	1.17309	2.31085	2.25659	0.584405	0.738715	0.568282	2.04095	0.526926	0.636558	1.1997	1.48859	1.96797	2.20893	1.67202
Black Pepper	0.443732	0.745396	0.379178	0.856332	1.88185	2.01605	1.86642	1.03815	1.88929	2.40441	0.893739	0.964132	0.724714	1.03135	0.406806	1.10979	0.328407	0.884823	2.0593	2.13631	1.84785	1.8073	2.07003	1.91401	1.12121	1.15592	0.853957	1.67124	0.462663	0.354721	0.969266	1.1663	2.09411	2.48045	2.46171	1.38457	2.82106	2.83122	0.648008	0.815707	0.629413	1.76054	0.579354	0.833304	1.59882	1.96964	2.51633	2.82736	1.64483
Black Pepper	0	0.0726175	0	0.489368	1.23931	1.47227	1.28226	0.48869	1.28856	1.80534	0.246655	0.285682	0.138916	0.3701	0	0.473523	0	0.326792	1.54002	1.64801	1.34052	1.27705	1.50492	1.32571	0.548753	0.642011	0.248726	1.06303	0	0	0.408322	0.502285	1.54274	1.96572	1.88011	0.846415	2.05874	2.08487	0.00458298	0.307664	0.110641	1.15745	0	0.35519	1.13953	1.50178	2.05906	2.36117	1.06265
Black Pepper	0	0	0	0.20558	0.937006	1.19774	1.23854	0.336979	0.828213	1.3145	0	0.257941	0	0.120595	0	0	0	0.136989	1.28944	1.41588	1.11556	0.995308	1.41752	1.30463	0.427525	0.676196	0	0.588154	0	0	0	0.264912	0.861956	1.56599	1.66429	0.634763	1.41526	1.37602	0	0.10812	0	2.59317	0.0268484	0.510304	1.05092	1.57817	1.61243	2.04083	0.8738
Black Pepper	0.145379	0.709434	0.0906577	0	0.475971	0.558206	0.823113	0.847918	0.747057	1.01853	0.204249	0.410171	0.128415	0.212672	0.0359383	0.377058	0.0380695	0.135112	0.725152	0.581655	0.800815	0.661404	1.19766	0.936403	0.326322	0.483068	0.164083	0.660899	0.0869423	0.487581	0.221778	0.118252	0.638795	0.996639	1.27119	0.419799	0.929696	0.911305	0.156123	0.282655	0.180519	2.1702	0.22335	0.178431	0.49603	0.801499	0.992626	1.26693	0.766019
Black Pepper	0.497288	0.788726	0.447148	0.561128	0.83645	0.86832	1.04733	0.840342	0.972824	1.17322	0.494337	0.736555	0.468812	0.433996	0.382869	0.635177	0.261358	0.399328	1.0681	0.977197	1.01489	0.978319	1.50646	1.32021	0.642216	0.692532	0.504728	1.00313	0.420877	1.09684	0.588432	0.455762	0.902506	1.1973	1.34326	0.561203	0.972891	1.09858	0.602525	0.811115	0.512649	2.45841	0.415016	0.650648	0.774649	0.838148	1.11287	1.5025	0.967405
Black Pepper	0.156667	0.181642	0.145116	0.236373	0.335228	0.415678	0.457116	0	0.718886	0.749826	0.16104	0.0382557	0.148697	0.130845	0.0860411	0.171233	0.109589	0.137652	0.422184	0.196978	0.820575	0.637245	0.701977	0.715621	0.242683	0.00469425	0.151648	0.144253	0.106282	0	0.00822237	0	0.386541	0.527177	1.13112	0.474543	0.861718	0.726397	0.0951925	0	0.117401	0	0.139451	0.024151	0.201758	0	0.53888	0.782344	1.23874
Black Pepper	0.183557	0.0931114	0.0647604	0.141724	0.299882	0.340865	0.441358	0	0.575441	0.62348	0.116201	0.0069388	0.124083	0.113198	0.0957159	0.166596	0.147284	0.127994	0.379947	0.222395	0.637004	0.507979	0.601691	0.504882	0.253974	0	0.123535	0	0.0143377	0	0	0.0134774	0.267004	0.476122	0.855973	0.447016	0.637241	0.582492	0.0999399	0	0.107271	0	0.145235	0.0413939	0.194896	0.0416623	0.48636	0.900316	0.929444
Black Pepper	0.186861	0	0.0570647	0	0.244494	0.257352	0.490538	0	0.424539	0.463926	0.0880188	0.0772398	0.107751	0.209123	0.0656688	0	0.104157	0.0664109	0.410825	0.0478402	0.517206	0.433736	0.559135	0.465827	0.208043	0.212548	0.0645966	0.00203531	0.00224724	0	0	0	0.260554	0.443032	0.751634	0.300229	0.555444	0.459759	0	0	0.0705741	0.105723	0.159132	0.154269	0.222994	0.115846	0.586555	0.724326	0.747643
Black Pepper	0	0	0	0	0.316071	0.6539	0.587278	0	0.515875	0.791809	0	0	0	0	0	0	0	0	0.431023	0.570275	0.846108	0.811293	0.747312	0.909508	0.0896895	0.180556	0	0	0	0	0	0.102387	0.117953	0.677703	1.13229	0.523564	1.2934	1.29994	0	0	0	0	0	0	0.277137	0.713739	0.857789	1.18424	1.17313
Black Pepper	0	0	0	0	0.124225	0.0959823	0.371152	0	0.34408	0.517836	0	0	0	0	0	0	0	0	0.285016	0.14397	0.847307	0.592862	0.676221	0.745888	0	0	0	0	0	0	0	0	0.0613444	0.303233	1.01253	0.2556	0.969209	0.877582	0	0	0	0	0	0	0	0.0643434	0.750705	1.2102	1.05498
Black Pepper	0.269882	0.233028	0.234773	0.163687	0.468836	0.526611	0.722347	0.114455	0.861476	0.976062	0.289876	0.162452	0.268998	0.307587	0.218262	0.300693	0.259333	0.223188	0.509086	0.334595	0.999195	0.851741	0.913636	0.959142	0.378748	0.353941	0.242808	0.223161	0.158626	0	0.185148	0	0.49215	0.632227	1.42848	0.799867	1.68659	1.58138	0.303684	0.235384	0.160246	0	0.174528	0.127725	0.3656	0.125777	0.603776	0.670387	1.35413
Black Pepper	0.257152	0.176503	0.162169	0.0976527	0.362148	0.460842	0.668164	0.0880249	0.719356	0.744336	0.232758	0.0481916	0.215801	0.281236	0.180603	0.178337	0.247218	0.0701002	0.426777	0.334753	0.800982	0.688548	0.767991	0.769693	0.364884	0.247257	0.236525	0.105154	0.130171	0	0.0368938	0.165964	0.370999	0.629915	1.08042	0.602729	1.29787	1.17282	0.188338	0.228272	0.129086	0	0.274317	0.203837	0.289034	0.068406	0.494941	0.892292	1.06488
Black Pepper	0.265043	0.235299	0.286632	0.107043	0.404329	0.459653	0.635232	0.174873	0.656459	0.704413	0.264547	0.0721797	0.183629	0.252901	0.208381	0.145465	0.227229	0.13493	0.465688	0.101755	0.704232	0.507208	0.704683	0.708677	0.315365	0.278903	0.210295	0.0111838	0.166894	0	0.127423	0.20484	0.42136	0.461268	1.02949	0.569024	1.1882	1.16384	0.298619	0.21873	0.174918	0	0.23483	0.101943	0.228844	0.309872	0.50763	0.781815	0.969175
Black Pepper	1.29573	0.683384	0.356747	0.695413	1.78833	1.70618	2.96415	0.982174	1.69178	2.05042	1.10345	2.8957	1.13144	2.51638	0.861692	1.044	0.574104	1.00692	1.8289	2.08274	2.02167	1.8629	3.33934	3.46406	1.91422	2.01643	0.875485	2.29205	0.777117	2.24303	1.0324	1.35077	1.87495	2.11979	2.87087	1.70296	1.80157	2.47617	1.76253	2.05972	1.314	5.99432	2.15292	1.96662	1.13698	2.11674	2.28462	2.95515	1.36551
Black Pepper	0.616649	0.372913	0.224741	0.369844	1.03012	0.985937	1.859	0.536237	0.980756	1.22802	0.544757	2.32912	0.672718	2.05335	0.525623	0.660261	0.29098	0.611725	1.00529	1.36068	1.22205	1.03076	2.49533	2.49185	1.08932	1.17107	0.468112	1.55197	0.444256	1.64187	0.552883	0.719481	1.04891	1.35965	1.89931	0.878634	1.11651	1.81341	1.02427	1.28803	0.678138	5.18548	1.39005	1.24744	0.576769	1.21806	1.31531	1.86449	0.79958
Black Pepper	0.389698	0.220487	0.168074	0.253775	0.611948	0.384906	1.18808	0.353447	0.628576	0.762538	0.360602	1.77142	0.426978	1.65882	0.320395	0.253732	0.225383	0.357057	0.577904	0.886649	0.758787	0.692841	1.9038	1.99478	0.61906	0.726877	0.307439	1.16919	0.26516	1.07979	0.393106	0.467367	0.75126	0.80771	1.27965	0.485665	0.735861	1.18218	0.606073	0.810897	0.473329	4.42111	0.934662	0.789581	0.314668	0.989721	1.00015	1.21065	0.477473
Black Pepper	0.0480614	0.399622	0	0.0428697	0.195471	0.339247	0.407811	0.228025	0.255993	0.369592	0.0737063	0.190448	0.103738	0.072266	0.0103967	0.131788	0	0.275272	0.244504	0.295605	0.460358	0.455271	0.47005	0.618903	0.115209	0.186579	0.0739396	0.15527	0.0272158	0.143254	0.124458	0.27587	0.263962	0.479865	0.570718	0.154082	0.516932	0.653472	0.0996533	0.244223	0.130312	1.22317	0.0857865	0.0991823	0.0892996	0.201438	0.455122	0.692148	0.25909
Black Pepper	0	0	0	0.0244403	0.0837981	0.0813784	0.18596	0	0.0335597	0.19198	0	0	0	0	0	0.142716	0	0.167229	0.0596475	0.214803	0.120742	0.201563	0.184877	0.390237	0	0.174634	0	0	0	0	0	0.231744	0.0506927	0.203493	0.304798	0.0709944	0.202008	0.402664	0	0.0159158	0	0.637571	0	0.0161651	0	0.12997	0.268209	0.303773	0.042799
Black Pepper	0	0	0	0	0	0.119032	0.136137	0.00545016	0.0386261	0.195951	0	0	0	0	0	0	0	0.16996	0.045825	0.166606	0.0921289	0.0841107	0.222172	0.397203	0	0.0366729	0	0	0	0.0704388	0	0.156539	0.0957015	0.337253	0.3959	0	0.179855	0.275289	0	0.0884347	0	0.570952	0	0	0	0.167146	0.313143	0.402013	0.0473978
Black Pepper	0.374249	0.499902	0.219327	0.357503	0.881015	0.682958	1.28689	0.556847	0.695199	0.804747	0.37268	1.47642	0.357707	1.51508	0.262239	0.366722	0.251443	0.547417	0.753968	0.986571	0.847126	0.805342	2.01098	2.02474	0.61576	0.558048	0.270048	1.23762	0.181913	1.4353	0.385646	0.339148	0.867752	1.00756	1.34055	0.507434	0.868111	1.0254	0.557778	0.787852	0.399947	4.30759	0.810699	0.875385	0.34879	0.830386	1.41291	1.45901	0.520537
Black Pepper	0.310899	0.512741	0.265631	0.400483	0.779807	0.597262	1.18092	0.520289	0.723463	0.810341	0.421676	1.39821	0.412	1.59116	0.274101	0.281185	0.265045	0.658175	0.824796	1.02915	0.843819	0.780639	1.89627	1.86532	0.596347	0.553659	0.334869	1.26024	0.297948	1.47052	0.506636	0.713555	0.941318	1.25905	1.40524	0.539831	0.881023	1.02423	0.694843	0.892776	0.479693	4.48133	0.904399	0.915088	0.545041	1.14931	1.5484	1.57102	0.580676
Black Pepper	0.255261	0.853555	0.170098	0.328396	0.388287	0.436757	0.593353	0.764548	0.465777	0.509311	0.327715	0.835129	0.290874	0.553802	0.156839	0.434484	0.143353	0.728749	0.499908	0.824783	0.717754	0.681595	1.08523	1.13594	0.27505	0.453317	0.258183	0.479353	0.244382	0.622945	0.428442	0.484877	0.614172	0.842668	0.819801	0.269302	0.544872	0.704831	0.396487	0.454777	0.23761	3.47701	0.475333	0.481257	0.227145	0.53238	0.634116	0.907641	0.317063
Black Pepper	0.124555	0.0671053	0.189373	0.493741	0.920387	1.05797	1.51926	0.263966	0.958548	1.41761	0.38816	0.500001	0.442707	0.4932	0.15385	0.428964	0.241029	0.55701	0.966806	1.35593	1.23088	1.18897	1.44103	1.57175	0.743093	0.875251	0.400198	0.689204	0.203128	0.18268	0.331343	0.453181	0.77222	1.14857	1.7944	1.0979	1.83113	1.98014	0.518024	0.683764	0.2863	0.868504	0.360587	0.459935	0.850311	1.05152	1.16571	1.67041	1.11268
Black Pepper	0.132954	0	0.0813155	0.137627	0.523851	0.510392	0.935818	0.0438188	0.586702	0.89813	0.204279	0.217889	0.243181	0.253803	0.136057	0.384742	0.155788	0.273858	0.623157	0.9178	0.739034	0.681365	0.889509	0.953165	0.388935	0.38201	0.2485	0.415368	0.0341959	0	0.0606213	0	0.443134	0.734105	1.18689	0.586772	1.24822	1.36686	0.240658	0.357315	0.104639	0.539302	0.215486	0.108067	0.532746	0.507358	0.636597	1.02805	0.688624
Black Pepper	0.126864	0.0669099	0.0938842	0.23805	0.370256	0.298433	0.556985	0.095636	0.477886	0.691377	0.159084	0.196351	0.226951	0.162152	0.126775	0.316163	0.171945	0.189956	0.358561	0.650275	0.596911	0.488389	0.569264	0.618838	0.255888	0.262475	0.23827	0.336577	0.0753587	0	0.0876747	0.101634	0.329988	0.560027	0.906345	0.365647	0.949793	1.02188	0.253152	0.278018	0.0729527	0.54144	0.189058	0	0.443741	0.572505	0.537345	0.729212	0.583804
Black Pepper	0.12711	0	0.0886939	0.292291	0.353084	0.234251	0.371626	0	0.451176	0.466037	0.11886	0.132779	0.147911	0.152783	0.120847	0.266999	0.156254	0.143143	0.288577	0.199537	0.622971	0.488011	0.586306	0.456374	0.19432	0.270035	0.171578	0.180716	0.0674053	0.0368971	0.0600009	0	0.299134	0.362894	0.910093	0.350463	0.787609	0.79132	0.177937	0.260761	0.0650709	0.780727	0.228609	0.0661594	0.468628	0.479696	0.635659	0.71964	0.788257
Black Pepper	0.13816	0	0.148804	0.263322	0.31431	0.0683441	0.312082	0	0.404474	0.475662	0.134547	0.145252	0.16974	0.108892	0.118498	0.301358	0.172807	0.129384	0.250957	0.19228	0.435329	0.276082	0.485185	0.348349	0.219092	0.244529	0.199403	0.226218	0.101277	0	0.0883945	0	0.278169	0.421232	0.761131	0.222714	0.636482	0.62223	0.190033	0.251165	0.126623	0.642363	0.175395	0.133993	0.352943	0.303823	0.498841	0.297972	0.593509
Black Pepper	0.123446	0.0317457	0.0962986	0.0966111	0.247727	0.0177419	0.274675	0.0491479	0.393149	0.415755	0.159161	0.207831	0.182433	0.0449948	0.111453	0.213054	0.157874	0.084138	0.318429	0.300329	0.397796	0.262233	0.374165	0.444512	0.179492	0.244415	0.23691	0.0938319	0.145837	0.111849	0.141899	0.014882	0.353123	0.36067	0.704727	0.184443	0.509007	0.626306	0.264104	0.173837	0.152927	0.546017	0.20046	0.242441	0.307411	0.35051	0.525405	0.366882	0.49323
Black Pepper	0.228595	0.0691255	0.172164	0.240192	0.816681	0.719165	1.65884	0.273662	0.920077	1.03638	0.40974	0.625745	0.449233	0.612519	0.311393	0.34251	0.264133	0.360321	0.855916	0.878358	1.09117	0.804705	1.6796	1.6293	0.736505	0.773821	0.422681	0.661927	0.233095	0.552694	0.336479	0.228622	0.787474	0.980388	2.01288	0.935922	1.12893	1.20736	0.846282	0.950895	0.368021	2.05826	0.491007	0.567377	0.650205	0.818839	1.12487	1.00781	0.927221
Black Pepper	0.213936	0.00801556	0.198083	0.394219	0.562465	0.39073	0.987838	0.11396	0.558322	0.676355	0.236922	0.414404	0.324709	0.335724	0.230004	0.409072	0.205474	0.127224	0.641444	0.779559	0.706621	0.519186	1.10719	1.09074	0.495829	0.474969	0.28296	0.513303	0.161945	0.41729	0.150009	0.15322	0.47012	0.707346	1.10835	0.511303	0.628625	0.752798	0.439437	0.515833	0.320104	1.71475	0.407014	0.399617	0.526511	0.814822	0.936341	0.890873	0.655154
Black Pepper	0.208992	0	0.18979	0.31625	0.46724	0.425469	0.634405	0.0728244	0.417062	0.494261	0.174147	0.35247	0.254353	0.260633	0.173724	0.282634	0.194291	0.187172	0.475452	0.544126	0.509939	0.503919	0.784873	0.665809	0.381117	0.497394	0.255367	0.354784	0.109428	0.247474	0.0623389	0	0.315897	0.540704	0.774652	0.277912	0.477048	0.581466	0.295377	0.44392	0.219581	1.39778	0.342152	0.330758	0.444865	0.412861	0.718628	0.73908	0.496329
Black Pepper	1.03347	0.547011	0.328522	0.424938	1.6854	1.72207	3.13255	0.974794	2.01156	2.32803	1.17541	1.99394	1.09095	2.24926	0.717103	0.855665	0.501282	0.747121	1.90612	2.0168	2.19084	2.06414	3.46369	3.55006	2.01044	1.90474	1.00558	2.04866	0.536619	1.60039	0.842175	1.08972	1.97375	2.29059	3.47973	2.27906	2.48666	2.468	1.89498	1.94327	1.27989	4.44496	1.50443	1.3735	0.843482	1.25049	2.01888	2.65905	1.31408
Black Pepper	0.837538	0.441518	0.348948	0.351463	1.47496	1.53311	2.91407	0.80926	1.74061	2.06615	0.9631	1.93769	0.946104	2.15586	0.583979	0.724933	0.43872	0.637477	1.57348	1.71762	1.77068	1.6437	3.13523	3.11077	1.56559	1.46897	0.735049	1.78827	0.388968	1.52541	0.58297	0.839733	1.59256	1.88811	2.84297	1.71062	1.85596	1.88962	1.41568	1.45943	0.940194	4.18886	1.20217	1.3217	0.694091	1.0122	1.60058	2.27439	0.908001
Black Pepper	0.468957	0.259904	0.313371	0.283939	1.01046	0.973517	2.18732	0.496015	1.16395	1.4472	0.631032	1.46155	0.655924	1.52287	0.392359	0.489528	0.32628	0.393211	1.06256	1.08027	1.2585	1.17402	2.54225	2.5556	1.19076	0.938361	0.491337	1.34017	0.309458	1.30918	0.440447	0.614964	1.13417	1.37979	2.28179	1.2691	1.31382	1.27515	1.06003	1.11361	0.767734	3.65465	0.879345	0.915137	0.500961	0.814133	1.27446	1.71931	0.656482
Black Pepper	0.335185	0.751087	0.470518	0.546988	1.59294	1.60624	1.74814	0.817164	1.46569	1.61018	0.685998	1.21229	0.714437	1.95544	0.454333	0.839689	0.441915	0.78488	2.00819	2.08812	1.8816	1.71698	2.24048	2.21578	1.05731	1.00203	0.65712	2.21915	0.484956	1.64892	0.842575	1.10386	1.7667	2.12808	2.37379	1.28094	2.25057	2.16818	1.13754	1.10903	0.684594	3.55983	0.879241	1.23561	1.36666	1.7585	2.9056	3.32527	1.59245
Black Pepper	0.172439	0.205576	0.166796	0.0709668	0.539617	0.382334	0.598545	0.162847	0.540779	0.645455	0.231687	0.455021	0.232008	0.63839	0.228204	0.34602	0.206601	0.282206	0.694494	0.665747	0.666244	0.63066	0.92782	0.865041	0.353244	0.0858989	0.240922	0.642647	0.139463	0.522035	0.147723	0.398676	0.502781	0.838552	0.940932	0.41466	0.863301	0.780647	0.293909	0.218603	0.22814	1.73313	0.197286	0.55906	0.355091	0.35932	1.13008	1.48836	0.659118
Black Pepper	0.113556	0.171701	0.124892	0.221233	0.337674	0.230518	0.390934	0.145995	0.43424	0.520697	0.181745	0.341342	0.154361	0.412698	0.168311	0.255161	0.209294	0.247688	0.465497	0.382462	0.502908	0.528468	0.652724	0.700699	0.232284	0.118339	0.210079	0.527666	0.129573	0.300047	0.194763	0.294157	0.39943	0.544987	0.790653	0.273494	0.698431	0.639067	0.289205	0.279337	0.199992	1.02822	0.146377	0.334296	0.220262	0.423512	0.820474	1.20002	0.532876
Black Pepper	1.5485	0.838819	0	0.572279	2.0741	2.05503	2.9035	0.741093	2.09549	2.34833	0.953209	2.11014	1.01786	2.82281	0.623484	0.899008	0.298449	1.00023	2.44585	2.56118	2.15805	2.08159	3.3375	3.37728	1.80713	1.60802	0.805014	2.90782	0.573713	1.10945	0.76815	1.45546	2.3842	2.79328	2.94444	1.86762	2.54309	2.52357	1.3145	1.46177	0.793638	4.88099	1.84147	1.79806	1.63017	2.15142	3.28691	3.99276	1.46032
Black Pepper	0.584167	0.184708	0.303512	0.653961	1.05683	1.12962	2.2421	0.41991	1.20636	1.49338	0.605721	1.11415	0.646308	1.20025	0.40413	0.597323	0.324921	0.319912	1.08771	1.25624	1.31032	1.18331	2.35415	2.35449	1.10868	1.25908	0.50886	1.35601	0.362295	1.28271	0.482035	0.619446	1.06472	1.27036	2.54286	1.56103	1.45111	1.49183	1.30245	1.41175	0.915443	4.01807	1.09551	1.19748	0.787262	1.25114	1.38935	1.87641	0.867779
Black Pepper	0.39838	0.078319	0.347759	0.55808	0.969791	1.00646	2.11395	0.309918	1.12626	1.39977	0.619884	1.16111	0.717118	1.22768	0.471752	0.619783	0.375379	0.456826	1.13485	1.23621	1.39573	1.30728	2.45672	2.47411	1.23927	1.34097	0.613253	1.48638	0.362464	1.44141	0.515715	0.704999	1.03239	1.29186	2.36382	1.47174	1.21704	1.40601	1.33679	1.41626	0.982949	3.82163	1.00322	1.18387	0.74056	1.26415	1.28308	1.87715	0.837459
Black Pepper	0.592729	0.120215	0.403841	0.765833	1.34921	1.40354	2.61669	0.5115	1.36025	1.69028	0.78097	1.73419	0.924152	1.67006	0.589903	0.817668	0.47611	0.463118	1.32906	1.54767	1.5605	1.43701	2.8645	2.8845	1.4589	1.68402	0.702694	1.8484	0.460652	1.80853	0.585144	0.821427	1.1712	1.41252	2.38234	1.46399	1.19186	1.59174	1.45632	1.5896	1.0459	4.24044	1.21147	1.47192	0.90802	1.5283	1.39692	2.16366	0.847075
Black Pepper	0.287405	0.219399	0.199036	0.506232	0.759048	0.932434	1.25476	0.0679511	0.818546	1.05959	0.395101	0.716801	0.431722	1.00562	0.292098	0.566316	0.196535	0.318368	0.991355	1.11681	1.10039	1.09078	1.37593	1.42465	0.618513	0.693507	0.291336	0.844577	0.193421	0.572634	0.234817	0.59882	0.674726	0.979023	1.53215	0.804739	1.21741	1.24966	0.463984	0.587	0.455158	3.05952	0.567845	0.798552	0.679339	0.963563	1.30361	1.56681	0.718416
Black Pepper	0	0	0	0	0.105992	0.520446	0.578623	0	0.0672243	0.411705	0	0.117871	0	0.90145	0	0	0	0	0.448905	0.80698	0.211498	0.47132	0.664282	0.871076	0	0.203563	0	0.502723	0	0	0	0.0118528	0.0491752	0.536124	0.697425	0.0609928	0.231995	0.474943	0	0	0	2.9618	0	0.0986939	0.150169	0.585192	0.829588	1.3385	0
Black Pepper	0.0800934	0.449411	0.0907149	0.263881	0.169164	0.233753	0.297844	0.341391	0.275986	0.383232	0.0500954	0.125293	0.107096	0.46004	0.110343	0.141716	0.024632	0.210049	0.188194	0.351911	0.456249	0.441465	0.368397	0.424776	0.069922	0.19654	0.097892	0.316645	0.0562662	0.0540447	0.0408428	0.11872	0.204831	0.247645	0.484863	0.20174	0.518254	0.433657	0.131406	0.181139	0.102049	1.62059	0.181454	0.325926	0.217625	0.363654	0.471827	0.492273	0.20743
Black Pepper	0.18562	0	0.0825354	0.434807	0.510431	0.584378	0.880306	0	0.626057	0.866898	0.256097	0.27251	0.306991	1.08585	0.216884	0.443628	0.216464	0.0661517	0.663638	0.784558	0.675284	0.731741	0.905638	1.01069	0.434335	0.463121	0.248097	0.760669	0.171485	0.24468	0.148251	0.295218	0.593847	0.650689	1.03264	0.670754	1.14876	1.2059	0.259931	0.297327	0.250712	0.867366	0.336764	0.430185	0.444694	0.505444	0.929442	1.25175	0.509061
Black Pepper	0.0824836	0	0	0.311552	0.538571	0.544066	1.0435	0	1.02095	1.22414	0.204263	0.164356	0.22207	1.87472	0.201846	0.515952	0.0597724	0.0406964	0.642052	0.872332	0.66333	0.625092	1.13494	1.23603	0.447892	0.510973	0.0864372	1.50351	0.073331	0.00493096	0	0.281122	0.979022	1.05936	1.59444	0.842662	1.43706	1.44063	0.0547025	0.203657	0.171568	1.56642	0.255784	0.760731	0.361558	0.636002	1.52869	1.67968	0.460628
Black Pepper	0.909204	0.259742	0.3478	0.546542	1.77189	1.70002	2.75395	0.492585	1.96095	2.13016	0.964678	1.85099	0.930988	2.54511	0.58669	0.896819	0.498848	0.570347	1.85412	1.79352	1.96465	1.72559	3.20625	3.1297	1.60274	1.40148	0.825987	2.17359	0.483257	1.38762	0.639451	0.979643	1.99515	2.17291	3.01488	1.80172	2.224	2.25902	1.50465	1.52754	0.770834	4.85085	1.42498	1.24701	1.28264	1.67484	2.15668	2.8655	1.19121
Black Pepper	1.12511	0.37227	0.348802	0.511598	1.76628	1.69142	2.82701	0.59781	1.93259	2.134	0.976363	1.80888	0.995958	2.47729	0.629659	0.928641	0.5467	0.706751	1.82254	1.79398	1.9008	1.71443	3.24414	3.15703	1.6569	1.53055	0.824934	2.20356	0.541609	1.6616	0.707018	0.976692	1.96062	2.11268	2.99663	1.74184	1.95857	2.05209	1.56896	1.58089	0.888089	5.10164	1.52859	1.42098	1.28437	1.67169	2.08037	2.63228	1.07926
Black Pepper	0.378305	0.0771961	0.266757	0.42699	1.0877	0.918227	1.7513	0.263738	1.16863	1.27374	0.523587	1.07566	0.584214	1.68635	0.332097	0.447362	0.305638	0.465404	1.17366	1.12973	1.10252	0.908781	2.27313	2.16655	0.855956	0.787237	0.493056	1.36154	0.332173	0.840207	0.455098	0.555945	1.26236	1.36912	1.96927	0.892062	1.24849	1.20307	0.912647	0.855135	0.359955	4.00841	0.838218	0.776297	0.812249	1.11012	1.5107	1.88385	0.630342
Black Pepper	0.146818	0.260291	0.183164	0.183824	0.485296	0.503772	0.549545	0.218201	0.594702	0.566199	0.247462	0.333045	0.23087	0.453207	0.16848	0.317832	0.2139	0.33791	0.554616	0.626965	0.706362	0.639476	0.782912	0.789716	0.242393	0.201023	0.242444	0.611353	0.205401	0.26392	0.269041	0.307282	0.600774	0.733714	1.01346	0.367048	0.810722	0.858267	0.377376	0.222866	0.0637433	1.65429	0.20021	0.111553	0.273385	0.391478	0.727671	0.644354	0.596864
Black Pepper	0.128545	0.111108	0.0827301	0.221174	0.306264	0.259967	0.403845	0.0105695	0.431552	0.457358	0.145412	0.138932	0.171226	0.179229	0.0851422	0.403894	0.192938	0.205866	0.454781	0.27722	0.56274	0.589578	0.483492	0.468224	0.179562	0.192809	0.189223	0.242448	0.0807853	0.216001	0.150444	0.144279	0.38681	0.552658	0.656692	0.22864	0.544156	0.536613	0.201121	0.14414	0.0144672	1.07436	0.194648	0.143563	0.196656	0.179662	0.420464	0.406117	0.376749
Black Pepper	0.119099	0.00243652	0.118885	0.195957	0.320604	0.329213	0.373287	0	0.358369	0.403174	0.14742	0.128924	0.13116	0.195206	0.131259	0.263303	0.188123	0.155512	0.36486	0.328841	0.407295	0.475219	0.453025	0.455278	0.147109	0.164519	0.171269	0.20183	0.107505	0.0927532	0.0623862	0.334776	0.293437	0.421332	0.578309	0.194481	0.436979	0.52452	0.179426	0.0433868	0.0549924	0.886588	0.159356	0.13091	0.218479	0.349289	0.498987	0.674777	0.319413
Black Pepper	0.151353	0	0.10801	0.213545	0.310546	0	0.383012	0	0.327708	0.380376	0.168375	0.163072	0.167865	0.369257	0.163912	0.252805	0.148475	0.164619	0.276473	0.264634	0.36422	0.41355	0.504736	0.550956	0.187146	0.0579955	0.159136	0.302478	0.108249	0.227819	0.0311103	0.0228361	0.284755	0.364199	0.563422	0.143015	0.420906	0.373652	0.0976139	0	0.0632832	1.2608	0.231498	0.142081	0.165876	0.402252	0.420561	0.284452	0.296675
Black Pepper	0.170442	0	0.181573	0.267034	0.379086	0.322123	0.457914	0	0.415063	0.498946	0.22807	0.310713	0.221369	0.350945	0.200337	0.298912	0.233535	0.212907	0.435699	0.353497	0.430685	0.358738	0.608099	0.580547	0.213487	0.10851	0.25804	0.386144	0.145432	0.274749	0.161418	0.298623	0.383223	0.467617	0.677167	0.345673	0.48889	0.486847	0.275024	0.185132	0.0801424	1.24246	0.198308	0.195667	0.268024	0.291844	0.465569	0.581062	0.370612
Black Pepper	0.182149	0	0.203791	0.252889	0.361554	0.151092	0.472215	0	0.457605	0.480441	0.272033	0.344684	0.236054	0.343713	0.279446	0.360532	0.284922	0.342117	0.484623	0.322115	0.457253	0.449671	0.676467	0.599236	0.289032	0.291943	0.328316	0.44031	0.208483	0.282161	0.2394	0.289508	0.475859	0.622317	0.771426	0.346715	0.539788	0.501506	0.396738	0.266366	0.173041	1.55521	0.246425	0.262241	0.273528	0.374529	0.46214	0.45908	0.371115
Black Pepper	0.343321	0	0.137744	0.0583136	1.16635	1.09055	2.03378	0.235545	1.17524	1.25818	0.477635	1.09832	0.425918	1.30227	0.431728	0.317144	0.238557	0.124184	1.18706	1.14089	1.70569	1.48023	1.97811	1.81081	1.37251	1.1236	0.532383	1.29498	0.15172	1.17246	0.327072	0.291436	1.01482	1.2101	2.17474	1.3228	1.56314	1.49438	1.63777	1.59438	1.4027	3.93079	0.89144	0.731429	0.549989	0.674711	1.57123	1.5383	1.02166
Black Pepper	0.437535	0.192069	0.251287	0.169909	1.54958	1.47453	2.31558	0.464809	1.38868	1.53926	0.641937	1.45258	0.654464	1.80381	0.615224	0.693907	0.427427	0.331049	1.55127	1.55774	1.89058	1.71066	2.38959	2.23524	1.68513	1.44425	0.739252	1.68633	0.320757	1.47483	0.576219	0.654992	1.40217	1.7896	2.31547	1.40625	1.80438	1.80732	1.8601	1.82905	1.55162	4.47956	1.15079	1.11268	0.918264	1.30831	2.02364	2.16076	1.20956
Black Pepper	0.424121	0.106539	0.218623	0.418626	1.45787	1.47062	2.23373	0.391504	1.25943	1.4047	0.587381	1.42495	0.631363	1.79426	0.634913	0.550991	0.339231	0.31199	1.43179	1.52359	1.71672	1.49485	2.30326	2.16959	1.61225	1.34847	0.709935	1.69535	0.339356	1.47636	0.525987	0.639204	1.22559	1.63332	2.07167	1.22607	1.36803	1.37743	1.56702	1.58127	1.38636	4.41291	1.04569	1.09019	0.812458	1.25437	1.78619	1.81661	0.983424
Black Pepper	0.163655	0.112984	0.243939	0.271081	0.88518	0.912636	1.13005	0.146355	0.875256	0.905385	0.284375	0.575819	0.35017	0.613946	0.216521	0.453259	0.215356	0.380988	1.0168	0.823671	1.12849	1.06566	1.38404	1.30982	0.474557	0.463848	0.347535	0.683738	0.187027	0.545555	0.364404	0.471248	0.759052	0.70719	1.39415	0.741411	0.531596	0.469909	0.587265	0.559249	0.337434	3.32092	0.530606	0.342012	0.585044	0.769851	1.54817	1.55969	1.06482
Black Pepper	0.123813	0	0.109731	0	0.291974	0.130214	0.321175	0	0.275982	0.237735	0.107734	0.214455	0.154261	0.256674	0.156055	0.233818	0.154567	0	0.34066	0.269178	0.259671	0.294409	0.407308	0.330842	0.149469	0.167163	0.133027	0.0514797	0.0969698	0.0753597	0.043518	0	0.144413	0.103778	0.214805	0.087238	0	0	0.0343509	0.0415274	0.0915215	1.64993	0.179557	0	0.237094	0.223625	0.398932	0.506266	0.376571
Black Pepper	0.11061	0	0.147905	0	0.305164	0.270181	0.354228	0	0.296342	0.272217	0.133322	0.284885	0.157486	0.171124	0.144709	0.218887	0.107656	0	0.465029	0.16966	0.279348	0.398778	0.351813	0.291468	0.158804	0.218257	0.154491	0.16851	0.100023	0.0946587	0.142102	0.132595	0.253586	0.253003	0.287239	0.0496211	0	0	0.0522038	0	0.134876	1.10574	0.142106	0.123308	0.210434	0.503206	0.592283	0.40986	0.367947
Black Pepper	0	0	0.0458326	0	0.283067	0.2009	0.305793	0	0.197323	0.283392	0.0108018	0.00389602	0.066779	0.0651289	0.0533157	0.0171823	0.0447177	0	0.282827	0.0859334	0.241164	0.370063	0.254599	0.204488	0.106163	0.115478	0.0689306	0.0417549	0.00683671	0	0.0858449	0.137514	0.125084	0.228808	0.153924	0	0	0	0.0454638	0.0297202	0.0251669	0.452933	0.075435	0.00584221	0.137383	0.34726	0.329207	0.0696323	0.24234
Black Pepper	0	0	0	0	0.18329	0.114707	0.179195	0	0.0787493	0.098142	0	0	0	0	0	0	0	0	0.123801	0.138728	0.0528343	0.193669	0.104529	0.0698796	0	0.0641763	0	0	0	0	0	0.0799983	0	0.132722	0	0	0	0	0	0	0	0.165741	0	0	0.061503	0.0267831	0.208732	0.303094	0.110154
Black Pepper	0	0	0	0	0.0806224	0	0.144776	0	0.014792	0.0318187	0	0	0	0	0	0	0	0	0.169084	0	0.0447534	0.158075	0.0694424	0.131376	0	0	0	0	0	0	0	0	0	0.0322952	0	0	0	0	0	0	0	0.176382	0	0	0.00628187	0.345186	0.153429	0	0.0267821
Black Pepper	0.239266	0.060683	0.280688	0.375525	1.4222	1.04039	1.42192	0.155384	1.14653	1.22482	0.447841	0.49442	0.393056	0.548881	0.283041	0.497454	0.322325	0.336861	1.82746	1.55149	1.84158	1.49236	1.61414	1.59655	0.571058	0.488291	0.397436	0.651186	0.323891	0.563071	0.535505	0.540922	1.36981	1.27277	1.90945	0.960626	1.63519	1.66729	0.658603	0.533149	0.380748	2.35417	0.501665	0.293269	0.723216	0.745883	2.4495	2.36463	1.37911
Black Pepper	0.277908	0.200689	0.303218	0.173083	1.06898	0.821125	1.11433	0.214208	0.913059	0.927467	0.389551	0.420802	0.351929	0.427484	0.245373	0.440827	0.340602	0.358171	1.42845	1.24937	1.3877	1.10172	1.33486	1.34456	0.488559	0.322013	0.386438	0.666278	0.320924	0.578725	0.491781	0.492216	1.05722	0.999972	1.50022	0.685535	1.22109	1.15814	0.616494	0.536519	0.335612	2.36352	0.43818	0.55276	0.587661	0.519889	1.98898	1.89128	1.06057
Black Pepper	0.275232	0.157597	0.26111	0.206779	0.989018	0.664156	1.01935	0.18013	0.779812	0.824503	0.352859	0.350157	0.335905	0.473443	0.302106	0.444227	0.323458	0.347405	1.36522	1.13669	1.29224	0.995137	1.32387	1.31766	0.468109	0.45004	0.317435	0.65861	0.244482	0.583811	0.389007	0.342975	0.910753	0.692012	1.29685	0.567787	0.980917	0.955491	0.518589	0.383091	0.237938	2.41661	0.428216	0.409045	0.517884	0.553288	1.86792	1.79325	0.922828
Black Pepper	0.21615	0.159211	0.247114	0.507884	1.90224	1.8015	2.11788	0.411346	1.78357	2.07923	0.645275	0.651405	0.545729	0.539839	0.305351	0.769663	0.384018	0.922239	2.43282	2.43746	2.51741	2.23969	2.02291	2.10785	1.00192	0.890407	0.628571	0.968386	0.333971	0.37417	0.709028	1.17241	1.8972	2.02252	2.67257	1.69215	2.4979	2.52221	0.989804	0.974046	0.503554	1.09112	0.561513	0.651803	1.29272	1.58854	3.04181	3.12835	2.01147
Black Pepper	0.161273	0.0625775	0.122619	0.412643	2.05945	1.87992	2.23484	0.42071	1.77203	2.09607	0.643953	0.655143	0.485795	0.501449	0.262256	0.576189	0.244712	0.904512	2.56611	2.47892	2.57719	2.2528	2.03129	2.08621	1.06728	0.962718	0.594441	0.990412	0.243307	0.224107	0.698285	1.30008	2.0209	2.11922	2.63166	1.5839	2.41915	2.46525	0.893145	0.904438	0.426086	0.958641	0.505986	0.740375	1.35181	1.6468	3.19625	3.2039	1.85535
Black Pepper	0.156021	0	0.115354	0.385525	2.13291	1.96674	2.26217	0.417081	1.79888	2.11817	0.627952	0.639546	0.466967	0.4887	0.228257	0.59062	0.260072	0.84734	2.68922	2.60589	2.66117	2.35815	2.07599	2.18334	1.03399	0.937093	0.598421	0.986586	0.225471	0.367617	0.762979	1.31759	2.07445	2.15717	2.62671	1.60048	2.38472	2.45756	0.914098	0.898561	0.469997	1.04599	0.50663	0.553731	1.42888	1.77903	3.27999	3.28683	1.86501
Black Pepper	0.278359	0.110231	0.199848	0	0.971365	0.734676	1.13028	0.148957	0.82826	0.864196	0.361796	0.417793	0.333688	0.46236	0.231299	0.504133	0.264714	0.282052	1.15041	1.22934	1.24168	1.03325	1.29446	1.27007	0.49435	0.398995	0.36249	0.583536	0.325439	0.404496	0.424286	0.323779	0.889917	0.876274	1.38802	0.795344	1.04189	0.993755	0.636247	0.448588	0.295759	2.51987	0.426547	0.450939	0.481197	0.414598	1.52621	1.68513	0.900729
Black Pepper	0.247774	0.0684085	0.253097	0.159458	0.77772	0.654419	0.849053	0.130142	0.685882	0.688041	0.360981	0.42117	0.351928	0.385111	0.239899	0.400538	0.288057	0.359424	1.07399	0.869929	1.02216	0.869545	1.14783	1.0927	0.409164	0.322954	0.335929	0.559039	0.304582	0.329127	0.430023	0.387772	0.788982	0.742895	1.09495	0.587834	0.736159	0.728531	0.534957	0.434872	0.288755	2.15208	0.354983	0.33472	0.405854	0.221804	1.38171	1.24447	0.692826
Black Pepper	0.260805	0.12639	0.355394	0.309746	0.91678	0.659065	1.00662	0.172616	0.883856	0.905036	0.37994	0.447095	0.316812	0.663197	0.302782	0.386982	0.327011	0.408466	0.969629	0.977447	1.65255	1.37787	1.30735	1.31576	0.543081	0.352246	0.38084	0.754256	0.335278	0.470422	0.467973	0.508163	0.758162	0.787682	1.57478	0.772157	1.73193	1.76392	0.850715	0.722316	0.427178	2.74254	0.448594	0.577723	0.411138	0.405483	1.18311	1.1228	1.3057
Black Pepper	0.0841941	0	0.211163	0.255847	0.492566	0.396017	0.587724	0.000891949	0.607789	0.659328	0.188202	0.250945	0.191731	0.369613	0.105778	0.396974	0.190084	0.172871	0.706731	0.431223	1.15353	0.990142	0.789671	0.747092	0.291953	0.148015	0.211092	0.43203	0.0858252	0.0890344	0.191533	0.306826	0.444526	0.695814	1.03161	0.485044	1.14659	1.07318	0.399979	0.270348	0.25623	1.53538	0.150757	0.286176	0.208642	0	0.849984	0.662848	0.82213
Black Pepper	0.0637769	0	0.131312	0.154372	0.420551	0.437067	0.504326	0	0.487259	0.579452	0.126841	0.156221	0.176488	0.177092	0.0799517	0.399347	0.177166	0.059805	0.561028	0.439196	0.901925	0.729507	0.584016	0.690778	0.249089	0.074774	0.170223	0.318389	0.0560467	0.0706779	0.173276	0.288861	0.361453	0.640652	0.83344	0.400632	0.931366	0.941296	0.384432	0.181145	0.157227	0.821086	0.150818	0.16298	0.166909	0.0906879	0.692653	0.463379	0.608493
Black Pepper	0.158893	0.0228233	0.455338	0.477461	1.73308	1.46853	1.67463	0.24103	1.43555	1.54532	0.578538	0.709638	0.411919	0.71512	0.270944	0.441821	0.368432	0.767712	2.04136	1.92952	2.19457	1.86002	1.86533	1.94317	0.981341	0.77558	0.650924	1.13917	0.215862	0.626245	0.502478	1.25485	1.1483	1.67689	2.27794	1.65131	2.34989	2.35742	1.13566	0.939474	0.661616	2.43383	0.604311	0.70053	0.841589	1.04628	2.12203	2.26313	1.74711
Black Pepper	0.164861	0.0465559	0.420034	0.602832	1.78341	1.58161	1.7756	0.323161	1.4638	1.62603	0.596753	0.732882	0.477327	0.783741	0.277785	0.555372	0.37712	0.80361	2.16219	2.18195	2.2538	1.96643	1.98664	2.03968	1.07641	0.982414	0.728128	1.11359	0.235612	0.901645	0.561526	1.31463	1.21418	1.79705	2.34075	1.81809	2.46488	2.45919	1.2282	1.0176	0.734763	2.78339	0.721983	0.847873	0.856616	1.06989	2.21125	2.52183	1.74653
Black Pepper	0.137792	0	0.203292	0.39905	0.77158	0.666028	0.685618	0.0215816	0.638827	0.72476	0.237965	0.297717	0.217652	0.348069	0.159423	0.350379	0.183473	0.413727	0.951776	0.700751	1.12853	0.957208	0.834599	0.801656	0.414502	0.260901	0.308882	0.455912	0.155819	0.331159	0.2091	0.479691	0.451278	0.704718	1.05306	0.673158	1.13363	1.15621	0.439714	0.309816	0.284142	1.37213	0.235592	0.388427	0.254842	0.186062	0.896572	0.905297	0.811417
Black Pepper	0.236599	0.201064	0.400917	0.505586	1.87955	1.6153	1.97761	0.344357	1.62448	1.77265	0.681169	0.880036	0.452134	1.38378	0.375166	0.555717	0.350868	0.863747	1.92335	1.61002	2.17985	1.86997	2.04908	2.07805	1.30163	0.982656	0.841099	1.6238	0.222611	0.528615	0.433732	1.12796	1.3472	1.73456	2.62682	1.60651	3.04962	3.12406	1.42782	1.20319	0.702892	3.70066	0.82642	0.918216	0.752272	0.681962	2.24063	2.20646	1.72035
Black Pepper	0.127378	0.159633	0.290282	0.515237	0.957654	0.823709	0.859123	0.139733	0.939896	0.98437	0.30978	0.291134	0.252679	0.448586	0.120201	0.47176	0.233403	0.317158	1.3131	0.862677	1.49987	1.22149	1.05068	1.07075	0.432401	0.372361	0.324965	0.625468	0.200291	0.151456	0.352243	0.491727	0.688832	0.918909	1.46935	0.672068	1.53909	1.51461	0.593067	0.350679	0.29489	1.63411	0.268805	0.336791	0.270665	0.473068	1.25953	1.19571	1.15927
Black Pepper	0.122625	0.0951391	0.268315	0.460564	0.904	0.719925	0.775908	0.0639506	0.915187	0.95834	0.2974	0.234746	0.230395	0.315341	0.0897954	0.53235	0.161651	0.488586	1.23087	0.867514	1.42027	1.16526	0.961034	0.975868	0.42492	0.321033	0.370452	0.6344	0.180083	0.21933	0.331749	0.459417	0.672585	1.0218	1.36163	0.655408	1.35689	1.33385	0.511918	0.292829	0.208951	1.25176	0.203973	0.161812	0.264158	0.342907	1.31705	1.25517	1.14898
Black Pepper	0.232936	0.49826	0.069791	0.489624	1.20043	1.3805	1.46253	0.10867	1.40934	1.50633	0.436419	0.462044	0.452688	1.04281	0.193702	0.855292	0.178728	0.635837	1.47888	1.32532	3.47166	3.0216	1.73114	1.68125	0.927847	0.754257	0.467662	1.32843	0.349155	0.482149	0.286559	0.843472	1.15196	1.51975	2.44833	1.39188	2.73635	2.81834	0.785478	0.765298	0.334426	3.31763	0.560504	0.50726	0.826004	0.894252	2.35341	2.42697	2.33023
Black Pepper	0.411447	0.536216	0.246392	0.623338	1.24438	1.37472	1.50431	0.189562	1.45661	1.59137	0.58818	0.613088	0.65966	1.12213	0.384316	0.867955	0.347096	0.790408	1.556	1.33295	3.44959	2.99382	1.80325	1.83642	1.00837	0.833489	0.624788	1.22316	0.497616	0.654477	0.424765	0.869286	1.20814	1.58733	2.43847	1.40488	2.70329	2.77115	0.81654	0.768264	0.467745	3.51588	0.685422	0.659106	0.871054	0.779468	2.35333	2.32654	2.36688
Black Pepper	0.335604	0.32829	0.165097	0.393126	1.22872	1.20943	1.50526	0.177724	1.34559	1.48511	0.49785	0.642489	0.507224	1.18421	0.345855	0.690522	0.260975	0.558415	1.43573	1.24564	3.43708	2.95105	1.74579	1.73195	0.969324	0.853342	0.472411	1.16881	0.415384	0.676025	0.347762	0.761732	1.12063	1.43559	2.38097	1.37343	2.58588	2.65324	0.656333	0.689305	0.421912	3.68179	0.648868	0.664308	0.926193	1.00463	2.39068	2.50487	2.3186
Black Pepper	0.333569	0.162891	0.215195	0.512099	1.02709	1.01438	1.37025	0.154896	0.919866	0.979857	0.381239	0.604586	0.547145	0.582754	0.328229	0.406917	0.229367	0.527967	1.29069	1.07158	1.83553	1.38911	1.63051	1.59429	0.841283	0.716585	0.496387	0.685644	0.258761	0.946465	0.459482	0.720857	0.84384	1.15748	1.66521	0.809492	1.08303	1.15948	0.922618	0.845274	0.738949	2.95312	0.622648	0.567204	0.910374	0.920114	1.72871	1.86771	1.30328
Black Pepper	0.364836	0.124693	0.245692	0.455601	0.926277	0.931449	1.37312	0.12335	0.786245	0.928789	0.340052	0.606082	0.590044	0.620074	0.383245	0.465282	0.278527	0.296152	1.12436	0.919985	1.60911	1.20543	1.59829	1.55468	0.815774	0.640742	0.463275	0.702841	0.227944	0.943615	0.384522	0.794905	0.746899	1.01856	1.457	0.730934	0.965503	1.06883	0.92199	0.870674	0.76086	2.9338	0.535579	0.526384	0.810305	0.840861	1.41171	1.51392	1.03394
Black Pepper	0.32851	0.155448	0.259338	0.333074	0.778114	0.753531	1.21625	0.131096	0.659437	0.697187	0.314122	0.549125	0.509555	0.63001	0.355571	0.42578	0.258139	0.470892	0.918537	0.726897	1.39931	1.00644	1.45969	1.42523	0.758609	0.660956	0.448306	0.557268	0.265726	0.887584	0.272316	0.468995	0.627193	0.905446	1.27926	0.639933	0.755754	0.821134	0.821748	0.786667	0.705274	2.83268	0.496177	0.388175	0.694495	0.880925	1.22149	1.45437	0.855461
Black Pepper	0.476704	0.405658	0.0881589	0.673954	1.38975	1.65659	1.81315	0.331268	1.27007	1.50732	0.539845	1.08881	0.639736	1.40589	0.381793	0.850995	0.375496	1.3045	1.70428	1.7923	2.95626	2.54479	2.14571	2.16292	1.35048	1.33675	0.585366	1.22263	0.356347	1.10045	0.552095	1.70994	1.2436	2.03271	2.26505	1.42437	1.69868	1.90996	0.913223	0.967569	0.744433	4.61966	1.11378	1.15362	1.41112	1.72469	2.31734	2.60078	1.96885
Black Pepper	0.0849502	0	0	0.115895	1.26362	1.42174	1.81515	0	1.21303	1.4597	0.156148	0.869994	0.314163	1.35691	0	0.266713	0	0.867969	1.5957	1.66216	3.34237	2.88021	2.11494	2.16739	1.21683	1.06384	0.148735	1.09089	0.0327856	0.866123	0.202767	1.41072	1.10496	1.87397	2.40303	1.28767	1.70479	1.83244	0.67947	0.828373	0.443223	4.72398	0.960281	0.92716	1.28355	1.51382	2.48735	2.69577	2.13572
White Pepper	0	0	0	0	0.406206	0.643725	0.839788	0	0.321152	0.514047	0	0	0	0.0461199	0	0	0	0	0.720103	0.729828	2.48205	2.01779	1.17523	1.16665	0.156074	0	0	0	0	0	0	0.399918	0.178589	0.89275	1.5044	0.403808	0.694404	0.832771	0	0	0	3.62293	0	0	0.33372	0.543848	1.74687	1.92539	1.33142
White Pepper	0.253636	0.256444	2.41742	2.23525	1.04141	0.65526	1.40912	0.376901	1.28018	1.38598	0.308281	0.28846	0.247347	0.939514	0.19355	0.392181	2.33014	1.78833	1.33531	0.987872	1.2779	0.825247	1.34004	1.29053	0.474391	0.366723	0.182897	1.07113	0.123608	0	0.576458	0.334663	1.19403	1.16398	1.68958	0.876203	1.89909	1.89023	0.435256	0.277258	0.206066	1.41295	0.371961	0.189383	0.78733	0.551985	1.86305	1.61759	0.920079
White Pepper	0.895516	0.736705	2.37174	2.154	1.96839	1.7541	2.54078	1.01341	1.99503	2.07108	0.879004	1.47765	0.815053	1.66601	0.641395	0.860896	2.42843	1.8197	2.3395	2.00635	2.09432	1.70039	2.96447	2.83796	1.48673	1.37862	0.892598	2.23629	0.593077	1.8996	1.16381	1.16972	2.13747	2.24444	2.52096	1.58769	2.22774	2.27066	1.64306	1.56393	0.844277	4.11837	1.32373	1.37073	1.63009	1.80181	2.97688	2.99732	1.02766
White Pepper	0.565919	0.235253	1.53871	1.22496	0.969147	1.10442	1.49834	0.357759	0.99372	1.1204	0.370345	0.835063	0.384192	0.992955	0.310953	0.405292	1.59848	1.09054	1.42633	1.13376	1.24723	0.889059	2.1951	2.04545	0.872965	0.807734	0.374376	1.505	0.180733	1.15461	0.626767	0.441478	1.19567	1.29962	1.48884	0.843589	1.26622	1.48585	0.831022	0.814307	0.347375	3.47111	0.836743	0.88088	0.848829	1.03439	1.63263	1.86663	0.433258
White Pepper	0.226449	0.205081	1.48351	1.40513	0.732084	0.713132	0.749721	0.172903	0.722994	0.788658	0.221762	0.161451	0.251767	0.462072	0.284431	0.332834	1.41115	0.981504	0.851541	0.7339	0.804919	0.624667	0.770053	0.806386	0.364839	0.108131	0.222617	0.762899	0.166819	0.15014	0.384951	0.386568	0.754736	0.856041	1.10172	0.559483	1.1224	1.11631	0.372348	0.172067	0.223027	0.584415	0.362802	0.274312	0.488537	0.385833	1.17577	1.26483	0.455944
White Pepper	0.217604	0.257563	1.26941	1.11777	0.667085	0.637638	0.757083	0.289064	0.724467	0.765283	0.265234	0.0916679	0.294354	0.296705	0.23099	0.307982	1.25995	0.75722	1.03327	0.766202	0.82215	0.603297	0.765118	0.727994	0.36924	0.26447	0.260372	0.749051	0.120006	0	0.470205	0.499396	0.841194	0.896109	0.952749	0.555197	0.980569	1.02129	0.40259	0.298622	0.216622	0.787564	0.38583	0.245248	0.725428	0.782218	1.59555	1.651	0.424659
White Pepper	0.200052	0.497655	1.08967	0.809077	0.715607	0.776586	0.748949	0.522432	0.74722	0.87015	0.279095	0.0977336	0.165405	0.300875	0.116098	0.481474	1.08805	0.663553	1.09297	0.87285	0.892663	0.712669	0.825904	0.846045	0.374772	0.485893	0.250089	0.946879	0.157892	0.108906	0.517036	0.516921	0.828586	1.10956	0.892541	0.497281	0.841435	0.823962	0.432556	0.291036	0.104435	0.74412	0.331817	0.160366	0.670457	0.492697	1.45657	1.51698	0.228118
White Pepper	0.389556	0.54802	1.25045	0.955028	1.17716	0.957642	1.37413	0.489427	1.58752	1.66278	0.495168	0.518131	0.372119	1.00596	0.294011	0.598021	1.24618	0.735478	1.51479	1.10782	1.49627	1.14145	1.62852	1.46047	0.657933	0.566884	0.495757	1.39903	0.403572	0.275734	0.628112	0.530016	1.56381	1.54529	1.98068	1.19704	2.1537	2.15099	0.680192	0.434621	0.259049	2.24117	0.624356	0.673652	0.889395	0.601875	2.01081	1.93154	1.01485
White Pepper	0.404257	0.656663	0.942408	0.815584	1.12347	1.12889	1.20508	0.712405	1.30477	1.3555	0.468807	0.443146	0.378036	0.824237	0.289522	0.636039	0.967156	0.529602	1.54102	1.16761	1.22433	0.93052	1.45323	1.36532	0.616756	0.71317	0.480552	1.28881	0.410234	0.386417	0.686023	0.609107	1.39171	1.59409	1.57143	0.768637	1.49931	1.38014	0.687009	0.47331	0.275474	2.41423	0.631286	0.629863	0.898389	0.717274	2.07794	2.09683	0.572367
White Pepper	0.132619	0.0451855	0.425468	0.358161	0.567836	0.513445	0.597857	0.0837421	0.592308	0.650967	0.154842	0.0609756	0.177955	0.310598	0.107825	0.195952	0.554159	0.19112	0.864876	0.625047	0.565889	0.347617	0.685647	0.826017	0.228521	0.278758	0.142258	0.58098	0.110742	0	0.204369	0.208653	0.642849	0.701993	0.748193	0.459491	0.846659	0.740428	0.194969	0.0951356	0.0197246	0.9187	0.196376	0.113543	0.527936	0.0875212	1.3112	1.13035	0.31028
White Pepper	0.0140075	0.301653	0	0.532817	1.52035	1.73755	1.90022	0.456872	1.86903	2.1559	0.665533	0.775165	0.505873	1.63476	0.249172	1.51949	0.12735	0.596991	2.11912	2.14132	1.69432	1.57554	2.09132	2.18936	1.19237	1.03952	0.500921	1.79843	0.263884	0.813944	0.439728	1.26198	2.13935	2.15835	2.366	1.57859	2.25507	2.34176	0.802766	0.982327	0.401704	2.30989	0.45183	1.0823	1.02901	1.55685	2.92308	3.15575	0.633586
White Pepper	0	0.00595014	0	0.331885	1.17927	1.35727	1.43825	0	1.43359	1.61209	0.288231	0.366475	0.118227	1.0515	0	1.18072	0	0	1.77833	1.61126	1.30856	1.07223	1.56541	1.64269	0.714034	0.717363	0.147036	1.43884	0	0.620106	0.0822903	0.685733	1.82429	1.74295	1.89206	1.0448	1.58112	1.75316	0.255279	0.428293	0.117486	1.99499	0.275927	0.859326	0.666843	1.25	2.81332	2.96154	0.349486
White Pepper	0	0.176064	0	0.368322	1.28084	1.48934	1.54403	0.14011	1.49085	1.71604	0.437235	0.542507	0.248523	0.98412	0.0813822	1.28607	0	0.515918	2.02524	1.94295	1.5449	1.39219	1.78267	1.86667	0.910255	0.840689	0.356442	1.50654	0.113851	0.770607	0.350078	0.972521	1.88506	1.90199	2.02685	1.15184	1.48103	1.73385	0.538343	0.628299	0.291501	2.21267	0.386456	1.05078	0.964238	1.44605	2.95506	3.13177	0.449795
White Pepper	0.0361138	0.138578	0.0111765	0.629589	1.40558	1.41298	1.7235	0.26383	1.87183	2.01841	0.629647	0.687077	0.417539	1.24061	0.169737	1.10492	0.00189318	0.5358	1.89646	1.89845	1.52121	1.38435	1.95199	1.9801	1.10069	0.810022	0.478022	1.56231	0.300423	0.873724	0.446601	0.983435	2.06543	2.04804	2.29527	1.39626	2.13101	2.26307	0.709641	0.780721	0.44037	2.43275	0.573193	0.915981	0.873009	1.35749	2.82421	2.98099	0.611152
White Pepper	0	0	0	0.117407	1.551	1.66657	1.77486	0.0838301	2.03426	2.1362	0.516339	0.50764	0.321725	1.37773	0	1.13553	0	0.294945	2.0015	1.92543	1.63633	1.3907	1.92066	1.9976	0.994061	0.585963	0.335189	1.71843	0.100839	0.927381	0.123399	0.599306	2.16209	2.14901	2.47387	1.44981	2.11602	2.18575	0.547059	0.575541	0.292394	2.84851	0.515737	1.07253	0.796264	1.1728	3.07143	3.22926	0.427628
White Pepper	0	0	0	0.225087	1.14067	1.13436	1.37521	0	1.67666	1.78523	0.258988	0.247188	0	1.01411	0	0.873473	0	0	1.64736	1.60302	1.22452	1.02801	1.52488	1.55032	0.665244	0.432535	0.0505696	1.31619	0	0.588878	0	0.537953	1.80102	1.73423	2.16041	1.2344	1.72269	1.83948	0.299151	0.415314	0.0633408	2.52177	0.201363	0.80651	0.476179	0.887613	2.61485	2.73587	0.13826
White Pepper	0.020606	0.226462	0.038213	0.559871	0.80444	0.937576	1.01216	0.214075	0.964668	1.04907	0.234347	0.366481	0.13664	0.833875	0.0701514	0.744717	0	0.268319	1.23388	1.30642	0.979897	0.788014	1.35219	1.35947	0.504698	0.31709	0.165542	0.850011	0.0231569	0.625318	0.239873	0.596627	1.40551	1.3687	1.36629	0.680031	0.982056	1.21071	0.256388	0.278285	0.0610725	2.52593	0.217018	0.644232	0.39356	0.999904	2.07067	2.14958	0.293655
White Pepper	0	0	0	0.155684	0.426513	0.423871	0.492531	0	0.401711	0.550385	0	0	0	0.467607	0	0.284859	0	0.168196	0.658659	0.719447	0.31913	0.272114	0.742265	0.870858	0.109416	0.104263	0	0.546449	0	0.0323491	0	0.0990039	0.819507	0.873273	0.745139	0.187931	0.274501	0.573844	0	0	0	2.07264	0	0.0839447	0.0263303	0.546026	1.36937	1.60301	0
White Pepper	0	0.0146965	0	0.494841	0.906	1.04548	0.916106	0.030544	0.851969	1.08172	0.0393373	0.28915	0	0.605526	0	0.734603	0	0.014886	1.29584	1.45171	0.880543	0.780226	1.25169	1.22457	0.43029	0.633529	0.05292	0.993831	0	0.420043	0.0832173	0.800995	1.21271	1.35562	1.1899	0.539149	0.557731	0.906649	0.0886919	0.148299	0.0321067	2.15418	0.257942	0.617334	0.597238	1.30949	2.01723	2.24589	0
White Pepper	0.270816	0	0.184458	0.275751	0.979272	0.737754	0.988733	0	0.90855	0.955157	0.299904	0.373665	0.31144	0.572946	0.279425	0.442601	0.345549	0.496788	1.12643	0.631424	0.905023	0.690692	1.28442	1.23589	0.538971	0.243497	0.269434	0.661693	0.256676	0.429232	0.230765	0	0.958012	0.893694	1.39136	0.771324	1.46629	1.44124	0.395383	0.380678	0.222989	1.37443	0.402349	0.531708	0.740526	0.973203	1.73054	1.05963	0.721608
White Pepper	0.326377	0.128239	0.239207	0.314123	0.788757	0.764403	0.80527	0.173151	0.758786	0.784349	0.332689	0.434832	0.313063	0.603012	0.333895	0.561171	0.320294	0.447639	0.873418	0.638373	0.754276	0.607096	1.08097	0.945857	0.508627	0.491029	0.325778	0.448595	0.274857	0.42732	0.190747	0.0222533	0.684081	0.742093	1.24205	0.755677	1.35645	1.30507	0.305476	0.312181	0.259901	1.2383	0.473563	0.703173	0.626864	0.999664	1.38962	1.13491	0.594039
White Pepper	0	0	0	0	0.495979	0.473375	0.59514	0	0.405936	0.418187	0	0	0	0.384843	0	0.0930667	0	0	0.687765	0.57216	0.350341	0.128429	0.743067	0.886002	0.0747108	0	0	0.284282	0	0	0	0	0.436251	0.369021	0.871917	0.474867	0.572317	0.582824	0	0	0	1.13893	0	0	0.272215	0.897778	1.48511	0.841924	0
White Pepper	0.251932	0	0.226116	0.591027	1.06752	1.06456	1.22318	0	0.954684	1.09789	0.40503	0.427937	0.359764	0.590504	0.246486	0.357526	0.323771	0.602356	1.17411	0.954876	0.979727	0.78794	1.38886	1.52322	0.670648	0.533229	0.32155	0.609854	0.212928	0.321881	0.229255	0.224823	0.844761	0.843022	1.37458	0.886874	1.41348	1.50652	0.390635	0.476442	0.205646	1.1493	0.488367	0.668014	0.863343	1.22091	1.7241	1.28911	0.628003
White Pepper	0	0	0	0	0.470931	0.551184	0.544211	0	0.329297	0.404613	0	0	0	0.326752	0	0	0	0	0.655358	0.297058	0.227998	0.246688	0.648473	0.600775	0.0416499	0	0	0	0	0	0	0	0.229065	0.0890356	0.660437	0.275781	0.646411	0.651389	0	0	0	1.08941	0.12222	0.362936	0.349339	0.932931	1.31313	1.00585	0.255257
White Pepper	0.00227733	0	0	0.183329	0.719261	0.652293	0.746335	0	0.721902	0.799948	0.0277205	0.0929358	0.0147573	0.330892	0	0.360164	0	0	1.00429	0.759139	0.569454	0.519084	0.988973	1.12747	0.244551	0.135976	0.175349	0.471578	0	0	0	0	0.684012	0.705775	0.932789	0.463334	0.870185	0.926206	0	0	0	1.54316	0.0522844	0.418282	0.557546	0.887754	1.57363	1.36207	0.232136
White Pepper	0.436589	0	0.437899	1.17422	2.34678	2.56479	2.47129	0.542259	1.80271	2.17767	0.914029	1.23227	0.863681	1.43614	0.433022	0.607952	0.785424	1.31725	2.69489	2.6295	2.28793	2.16439	2.70643	2.73412	1.5884	1.6945	0.83888	1.41208	0.448388	0.571381	1.10162	1.34075	1.92869	2.25565	2.52501	1.84413	1.92977	2.24436	1.07125	1.24891	0.596813	2.6634	0.913143	1.44659	2.31918	2.98347	3.07345	2.89326	1.51062
White Pepper	0.350239	0	0.140393	0.731126	1.88875	1.87359	1.94049	0.115966	1.26527	1.5987	0.58391	0.888677	0.557898	1.18876	0.33892	0.51005	0.459477	0.879043	2.1934	2.06553	1.66708	1.58715	2.08421	2.11025	1.14207	1.20402	0.519049	1.00628	0.168638	0.300336	0.688526	0.866071	1.47755	1.81947	1.91864	1.36132	1.29157	1.6892	0.62658	0.947318	0.360416	2.44388	0.829732	1.08135	1.94032	2.61134	2.69961	2.46916	0.95432
White Pepper	0.165984	0	0	0.399116	1.44407	1.50886	1.5264	0	0.855123	1.20004	0.324822	0.493704	0.319886	0.846128	0.142837	0.252202	0.216929	0.469288	1.83286	1.72762	1.3306	1.25543	1.69256	1.77158	0.840217	0.821587	0.21889	0.643725	0.0403388	0.177633	0.434576	0.475677	1.14078	1.43342	1.52343	1.06687	0.917289	1.34127	0.324649	0.660005	0.293531	2.39873	0.630713	0.877835	1.60918	2.3085	2.35788	2.04899	0.620872
White Pepper	0.0832335	0	0	0.567099	0.649633	0.796096	0.956215	0	0.842411	1.08687	0.05753	0.227826	0.0542434	0.634512	0	0.0650182	0.101293	0.30727	0.591879	0.498014	0.810843	0.710074	1.17929	1.23631	0.368855	0.396617	0	0.448577	0	0.115917	0	0.0153191	0.478489	0.557286	1.35258	0.709249	1.5678	1.53573	0.052451	0	0.165891	1.78101	0.233593	0.0423145	0.412134	0.533731	0.767557	0.841027	0.878744
White Pepper	0.176641	0.0816406	0.18093	0.651211	0.663515	0.72064	0.916729	0.0489376	0.965824	1.04964	0.236915	0.343611	0.19006	0.555246	0.156047	0.337636	0.175648	0.484208	0.889287	0.633149	0.939332	0.709075	1.1256	1.12445	0.447532	0.476985	0.19587	0.630504	0.0675354	0.189269	0.0897501	0.281596	0.828639	1.02656	1.49454	0.688834	1.71517	1.66912	0.257276	0.227071	0.146766	1.57617	0.333478	0.257715	0.469	0.594408	1.06563	1.13716	0.887674
White Pepper	0	0	0.242149	0.432959	0.454692	0.590223	0.608906	0	0.626073	0.780457	0	0	0	0.884293	0	0	0.787914	0.685019	0.55817	0.371389	0.42626	0.336294	0.758283	0.926317	0.155204	0.30596	0	1.02902	0	0.0326187	0	0	0.278109	0.41488	1.12805	0.431148	1.26059	1.31932	0	0	0	0.877769	0.00515471	0	0.172409	0.65173	0.836055	1.11196	0.572719
White Pepper	0	0	0	0	0.519844	0.628617	0.757018	0	0.7689	0.900832	0	0	0	1.28337	0	0	0	0.00590495	0.764271	0.235333	0.484754	0.126363	0.787361	0.922925	0	0	0	1.39298	0	0	0	0	0.609105	0.689249	1.36222	0.464026	1.26032	1.22766	0	0	0	1.23115	0	0	0.0497337	0.658768	1.53606	1.66605	0
White Pepper	0	0	0	0	0	0	0.0419964	0	0.095591	0.304758	0	0	0	0.559238	0	0	0	0	0	0	0	0	0.103299	0.208638	0	0	0	0.657134	0	0	0	0	0	0.00660032	0.701288	0	0.529468	0.46591	0	0	0	0.832969	0	0	0	0	0.783171	0.721695	0
White Pepper	0.13485	0.301581	0.672332	1.15794	1.04227	1.43883	1.40336	0.439213	1.0519	1.26286	0.308734	0.505347	0.316987	0.730525	0.11899	0.296368	1.0704	1.16085	1.13796	1.02763	1.04747	1.09315	1.27376	1.47779	0.640438	0.869099	0.339962	0.765976	0.183478	0.300838	0.417939	0.407699	0.760825	1.04894	1.37667	0.729921	1.46294	1.46636	0.395079	0.491099	0.216517	1.19069	0.326534	0.275301	0.730641	1.31244	1.04144	1.15464	0.680545
White Pepper	0	0	0.221111	0.519447	0.446878	0.507591	0.710256	0	0.412744	0.649326	0	0.0153163	0	0.27043	0	0	0.577064	0.651394	0.545847	0.548328	0.429795	0.594164	0.706886	0.914024	0.27047	0.424456	0	0.394887	0	0	0	0	0.274863	0.591404	0.890273	0.32137	0.910149	1.01864	0	0.173986	0	0.563526	0.0817712	0.133397	0.244341	0.398901	0.50752	0.583724	0.314863
White Pepper	0	0	0	0.223317	0	0	0	0	0	0	0	0	0	0	0	0	0	0.253242	0	0	0	0	0	0.0194421	0	0	0	0	0	0	0	0	0	0	0.0136433	0	0.145856	0.280495	0	0	0	0	0	0	0	0	0	0	0
White Pepper	0.961179	0.325049	1.94519	1.62451	1.67741	1.36291	2.76599	0.942422	1.77674	1.94702	0.853693	1.47923	0.919806	1.92411	0.704979	0.776777	1.51479	1.41553	1.51913	1.48838	1.8613	1.52153	2.84941	3.05466	1.64142	1.71779	0.723345	2.13098	0.442763	1.86176	0.624852	0.802395	1.39379	1.41169	2.51617	1.83135	1.81175	2.18318	1.4593	1.51574	0.935214	4.36331	1.46797	1.30192	1.25022	2.05235	1.85188	1.71724	1.10585
White Pepper	0.761054	0.296041	1.44734	1.28135	1.24408	0.833977	2.18424	0.645259	1.18799	1.42898	0.552687	1.37096	0.67758	1.44913	0.58913	0.582946	1.11502	1.07817	1.02523	1.24334	1.27252	1.05295	2.41113	2.57235	1.30771	1.4986	0.509669	1.83426	0.356265	1.96914	0.451567	0.511329	0.926515	0.846331	1.73483	1.1433	1.06255	1.5309	1.02898	1.05519	0.866615	4.13881	1.19303	1.22397	1.03071	1.84062	1.31443	1.23823	0.61891
White Pepper	0.719808	0.297959	1.42589	1.32628	1.31167	1.09624	2.31381	0.69266	1.31888	1.56997	0.644394	1.61018	0.826615	1.72961	0.649391	0.601535	1.16837	1.16888	1.25661	1.31691	1.5274	1.34331	2.77259	2.91343	1.51853	1.75382	0.618828	2.08817	0.479834	2.39955	0.567904	0.723355	1.08334	1.07592	1.93456	1.41836	1.13452	1.86145	1.21063	1.35644	0.943254	4.54408	1.39407	1.41971	1.11984	2.00131	1.48016	1.66219	0.724133
White Pepper	0.0807634	0.304288	0.667985	0.675087	1.24055	1.16352	1.6031	0.43937	1.23867	1.43696	0.191045	0.607619	0.195531	2.2744	0.301148	0.318286	1.33029	1.43118	1.27301	1.40959	1.24837	1.16011	1.53981	1.80887	0.725428	0.86429	0.0789143	2.24869	0.0754041	0.31118	0.0777052	0.677147	1.02564	1.17258	1.51284	1.01843	1.40035	1.72211	0.0842202	0.376726	0.222312	3.07403	0.71437	1.23506	1.0522	1.85389	1.9371	2.39829	0.849058
White Pepper	0.287997	0.246345	0.834799	0.833706	0.898875	0.675182	0.932432	0.189221	0.81208	0.928262	0.19717	0.182829	0.314611	0.831809	0.167286	0.493927	1.41794	1.39457	0.994634	0.854634	0.924	0.991885	0.920031	1.13712	0.438697	0.516988	0.254268	0.952085	0.129324	0.319388	0.11202	0.329292	0.672536	0.743957	0.984364	0.697718	0.947243	1.25614	0.0568056	0.157647	0.265076	1.98823	0.506115	0.491204	0.607499	1.18758	1.38044	1.13488	0.702976
White Pepper	0.222734	0.0545608	0.592108	0.404512	0.50204	0.0165024	0.673374	0.0803127	0.453249	0.564617	0.0180831	0.108233	0.132818	0.614506	0.0714447	0.226253	1.21951	1.13701	0.535772	0.518926	0.55135	0.437032	0.617567	0.796404	0.267799	0.395687	0.11331	0.686688	0.0520869	0	0	0.0935374	0.30664	0.381214	0.539763	0.415001	0.573937	0.839367	0	0	0.163538	1.73633	0.324027	0.315612	0.353852	0.980646	0.949398	0.760815	0.401921
White Pepper	0.932069	0.423	1.11812	1.01026	1.76053	1.47143	2.50867	0.788151	1.54622	1.70736	0.814217	1.94173	0.991508	1.89083	0.909822	0.804306	1.6184	1.65732	1.87835	1.83653	1.93892	1.60192	2.91222	3.08493	1.72444	1.82782	0.850369	2.56423	0.611662	2.94566	0.903542	0.970245	1.44206	1.42082	2.11137	1.53352	1.3053	2.03821	1.3493	1.53993	1.10256	4.71007	1.60666	1.68194	1.54808	2.52621	2.09974	2.01606	1.00281
White Pepper	0.830369	0.357779	0.982773	0.847083	1.64551	1.37451	2.2624	0.652491	1.31477	1.54648	0.657088	1.93165	0.913521	1.69881	0.784112	0.823773	1.50382	1.48021	1.65993	1.5515	1.68117	1.51402	2.59623	2.75466	1.59221	1.85538	0.736129	2.34089	0.53786	2.80763	0.782929	1.03566	1.19932	1.25808	1.72463	1.21345	1.09795	2.13654	1.1614	1.43097	1.03899	4.51756	1.51892	1.71137	1.57793	2.82483	2.0274	1.84584	0.979773
White Pepper	0.662611	0.358336	0.688759	0.712352	1.23386	0.972747	1.70227	0.416481	0.929721	1.11935	0.426517	1.53067	0.679244	1.31282	0.552515	0.657279	1.0522	1.06132	1.212	1.01687	1.19489	1.07024	1.97664	2.07057	1.07691	1.17041	0.492323	1.76797	0.343033	2.26592	0.494135	0.632897	0.703669	0.787305	0.9869	0.750175	0.653271	1.43914	0.574871	0.795886	0.622682	3.71511	1.02667	1.15093	0.991448	2.23925	1.33242	1.28313	0.495777
White Pepper	1.90855	1.22785	1.57458	1.69476	3.48991	3.81426	4.39568	2.72388	3.55389	3.96147	2.52285	3.38487	2.34305	2.54896	2.00759	2.04531	1.69683	2.06454	3.71209	3.87158	3.81266	3.64438	4.64792	4.74668	3.45349	3.80706	2.4336	3.04551	1.71833	3.0103	2.46942	2.68994	3.4289	3.64287	4.51634	3.4497	3.26156	4.05174	3.60395	3.79982	2.59929	4.62307	2.85496	2.67971	2.86926	3.08311	3.85708	4.20619	2.36652
White Pepper	0.990565	0.604458	1.05653	1.06603	2.38647	2.73405	3.36207	1.75759	2.45497	2.86389	1.53445	2.75679	1.49514	1.97023	1.22779	1.29767	0.974556	1.3166	2.50663	2.61869	2.63191	2.47533	3.78535	3.75012	2.44485	2.76422	1.47278	2.10767	1.01967	2.42739	1.52859	1.71393	2.23945	2.42785	3.23973	2.25887	2.17671	3.39911	2.53849	2.70312	1.71973	3.79053	1.94327	1.80629	1.7966	2.08195	2.72847	3.23382	1.39969
White Pepper	0.729878	0.445843	0.871899	0.985695	1.96152	2.29579	2.8274	1.31856	1.9594	2.38903	1.09845	2.46549	1.09907	1.74368	0.936864	1.00943	0.755451	0.876842	2.12134	2.21558	2.14957	1.96937	3.33048	3.31442	2.07364	2.35067	1.09721	1.8536	0.820682	2.22801	1.21882	1.30225	1.9218	2.12465	2.7985	1.7962	1.89244	3.21289	2.10725	2.34844	1.3862	3.59145	1.71938	1.59937	1.58087	2.05255	2.49903	3.09388	1.3026
White Pepper	1.77904	0.967543	0.571873	0.498158	2.30049	2.41753	3.10612	1.44965	2.60654	2.72312	1.26849	1.94061	1.02936	2.37653	0.989426	1.01681	0.568279	0.736256	2.53274	2.49202	2.43275	2.12895	3.31758	3.18333	1.89072	1.9262	1.10446	2.27232	0.741383	0.954735	0.987123	1.15427	2.54633	2.54549	3.2446	2.17201	2.58148	2.6102	2.04428	2.07076	0.95327	3.84776	1.8646	1.59797	1.66164	1.75354	2.95552	3.20395	1.18774
White Pepper	1.38996	0.708152	0.528112	0.430454	1.96544	2.02319	2.81961	1.237	2.26632	2.40536	1.05507	1.79024	0.929123	2.15125	0.844372	0.79319	0.530827	0.619786	2.2087	2.21213	2.17368	1.8209	3.15442	3.023	1.73545	1.89136	1.00154	1.92872	0.582643	0.92294	0.917762	0.835455	2.16294	2.24691	2.93167	1.84868	2.23061	2.31105	1.90068	1.92926	0.795709	3.63053	1.68496	1.35266	1.42855	1.46727	2.62749	2.83967	0.922847
White Pepper	1.11891	0.583039	0.433463	0.204471	1.45414	1.61363	2.37492	0.983793	1.85472	2.03901	0.772234	1.50186	0.653939	1.67507	0.612546	0.582625	0.409187	0.504935	1.87525	1.66122	1.77365	1.47433	2.79407	2.69656	1.41216	1.62572	0.77098	1.58011	0.456554	0.841961	0.674519	0.626644	1.76079	1.76384	2.48371	1.46694	1.7413	1.87245	1.57902	1.59017	0.671315	3.24948	1.39831	1.05714	1.06744	1.09894	2.14067	2.43874	0.711444
White Pepper	0.70585	1.10642	0.538247	0.421848	1.42036	1.73142	2.01331	1.36924	1.65631	1.78109	0.651124	1.15235	0.518902	1.00934	0.463677	0.820395	0.334606	0.717399	1.66784	1.66261	1.60401	1.34682	2.25558	2.11147	1.06912	1.20824	0.664969	1.20406	0.375445	0.647191	0.735798	0.513003	1.50039	1.64045	2.34316	1.33568	1.84171	1.97188	1.16553	1.16154	0.489972	2.4249	0.860672	0.843986	1.06423	1.11093	2.0269	2.41607	0.755387
White Pepper	0.437615	0.374109	0.486454	0.445738	1.00904	1.17111	1.72506	0.584078	1.27055	1.45051	0.581093	1.26128	0.438748	0.821797	0.43487	0.491063	0.303322	0.485311	1.30407	1.2611	1.26908	1.10293	2.33539	2.24448	0.997308	1.05606	0.593683	1.17414	0.36698	0.897505	0.620731	0.524882	1.16444	1.24185	1.88475	0.933527	1.26286	1.59486	1.05232	1.09098	0.483795	2.45467	0.812333	0.665309	0.68507	0.62375	1.43046	1.75608	0.432918
White Pepper	0.402993	0.352789	0.464239	0.360427	1.01827	1.19801	1.6208	0.593231	1.20557	1.33636	0.499493	1.15132	0.401793	0.94606	0.418687	0.53913	0.260998	0.236962	1.29051	1.23106	1.20866	0.985469	2.21279	2.09373	0.939143	1.01237	0.522281	0.987823	0.336469	0.919957	0.614239	0.641822	1.18914	1.2603	1.85911	0.97475	1.29186	1.62974	0.982787	1.00186	0.432179	2.3391	0.773822	0.56669	0.615108	0.659572	1.614	1.85754	0.4145
White Pepper	0.138506	1.13496	0.497722	0.420131	0.519368	1.04199	0.695724	1.14464	0.749407	0.674543	0.265906	0.154341	0.0952738	0.340956	0.126457	0.0401033	0.300899	0.714538	0.540678	0.817201	0.902037	0.871127	0.761219	0.759681	0.237385	0.592909	0.150853	0.277333	0.184005	0.101116	0.236711	0.446087	0.575646	0.552675	0.904754	0.493191	0.992163	1.04866	0.281067	0.145278	0.099566	0.733085	0.155282	0.519217	0.392366	0.359909	0.951336	1.12153	0.547673
White Pepper	0.0185902	0.0264882	0.218902	0.291113	0.441553	0.748638	0.754187	0	0.591271	0.665874	0.128314	0.175416	0.0946356	0.300142	0.0384504	0	0.145173	0.351097	0.663493	0.68413	0.665824	0.496954	0.883603	0.835214	0.263375	0.200415	0.153439	0.366146	0.0301954	0.0654341	0.139159	0.790142	0.496005	0.277798	0.736996	0.347655	0.863868	0.800048	0.0656883	0.0722001	0.0284758	1.00927	0.114423	0.512778	0.452624	0.278159	0.986606	0.984583	0.223271
White Pepper	0	0	0.142738	0.25283	0.364192	0.376901	0.559936	0	0.415551	0.521947	0.0708314	0	0	0.152505	0	0	0.0872086	0.311078	0.401303	0.433747	0.373905	0.234177	0.51221	0.521148	0.0358561	0.05128	0.0192382	0.311177	0.0137975	0	0.054561	0.568436	0.349146	0.107286	0.492684	0.179728	0.631478	0.6791	0	0	0	0.800403	0.0813344	0.224683	0.267328	0.196297	0.798817	0.788104	0.171615
White Pepper	0	0	0	0	0.544494	0.575148	1.16739	0	1.11989	1.31815	0	0.239286	0	1.51102	0	0	0	0	0.761175	0.468526	0.588964	0.324022	1.15181	1.0841	0	0	0	1.40123	0	0	0	0.0157015	0.803394	0.754411	1.63542	0.682673	1.84001	1.81033	0	0	0	2.2676	0	0.140913	0.145561	0	1.36173	1.77991	0
White Pepper	0	0	0	0	0	0	0.303134	0	0.66193	0.66931	0	0	0	1.02	0	0	0	0	0	0	0	0	0.332249	0.306336	0	0	0	1.0048	0	0	0	0	0.436474	0.193001	1.05757	0.0543523	1.31955	1.23806	0	0	0	1.92446	0	0	0	0	0.814898	1.37926	0
White Pepper	0	0	0.0405	0.0956619	0	0.116517	0.514261	0	0.19853	0.347838	0	0	0	0	0	0	0	0	0.0983456	0.0742637	0	0.00518187	0.351345	0.328925	0	0	0	0	0	0	0	0	0	0	0.252406	0	0.556618	0.697226	0	0	0	0.568104	0	0	0	0	0.220032	0.255618	0
White Pepper	0.133207	0.105831	0.671894	0.625527	0.683267	0.754428	0.841853	0	0.713422	0.747181	0.265965	0.272542	0.187498	0.377137	0.121972	0.215866	0.551628	0.64367	0.816731	0.755762	0.661134	0.681883	0.832504	0.894874	0.30829	0.26305	0.198788	0.514541	0.156625	0.236801	0.385717	0.745965	0.686007	0.662983	0.942232	0.468178	0.94959	1.07784	0.255841	0.107858	0.0908131	1.44211	0.299157	0.651903	0.586825	0.637799	1.14017	1.29579	0.22542
White Pepper	0.0358725	0	0.421875	0.4304	0.422452	0.627107	0.629247	0	0.482749	0.562363	0.0826929	0.0920441	0.0889916	0.221037	0.0716283	0.114868	0.373465	0.359893	0.632989	0.48681	0.437614	0.382561	0.603794	0.708618	0.129076	0	0.138697	0.346791	0.0590236	0.0179059	0.20399	0.481122	0.397235	0.276548	0.633652	0.401584	0.70976	0.817604	0.0492247	0	0.0766514	1.2979	0.22628	0.538159	0.430359	0.648583	0.884431	1.12317	0.114997
White Pepper	0	0	0.135997	0.106877	0.43038	0.337598	0.632854	0	0.651832	0.75603	0	0	0	0.545407	0	0	0.0663017	0	0.731743	0.684674	0.386266	0.27323	0.564622	0.551184	0.0218515	0	0.0263386	0.560307	0	0	0.129807	0.406629	0.607298	0.536591	0.889497	0.317336	0.748904	0.776891	0	0	0	1.75404	0.0507113	0.47049	0.250857	0.14503	1.16686	1.05822	0
[truncated: 150 more columns]
